# Supplementary material for: Early responses to dehydration in contrasting wild Arachis species
Source: PLoS One. 2018 May 30;13(5):e0198191. doi: 10.1371/journal.pone.0198191 (PMC5976199; doi:10.1371/journal.pone.0198191)
Supplement: S2 Table — Physiological measurements made on A. duranensis and A. stenosperma leaves during the dehydration treatment, using a portable Photosynthesis System (LI-COR, 150 model LI-6400). (XLSX) [file pone.0198191.s006.xlsx]

## Sheet: S2 Table
	Net Photosynthesis			Stomatal Conductance			Internal CO2 concentration			Transpiration			Leaf Temperature			Vapor pressure difference
	µmol CO2 m-2 s-1			mol H2O m-2 s-1			µmol CO2 mol-1			mmol H2O m-2 s-1			oC			kPa
	Mean	S.E.	T-test	Mean	S.E.	T-test	Mean	S.E.	T-test	Mean	S.E.	T-test	Mean	S.E.	T-test	Mean	S.E.	T-test
A. duranensis	30.2333	1.29142	0.0032871	0.633667	0.033473	0.00472106	278.333	6.48931	0.379658	7.76667	0.894527	0.0244927	26.51	0.441173	0.0311404	1.19333	0.0896908	0.0245595
A. stenosperma	11.0811	2.13406		0.191656	0.055292		263.444	12.9061		3.48333	0.818707		28.5444	0.441933		1.84444	0.142066
S.E. (standard error, n=3)
