# Supplementary material for: Early responses to dehydration in contrasting wild Arachis species
Source: PLoS One. 2018 May 30;13(5):e0198191. doi: 10.1371/journal.pone.0198191 (PMC5976199; doi:10.1371/journal.pone.0198191)
Supplement: S7 Table — Differentially Expressed Genes (1,602 DEGs) in pairwise comparison between samples of Arachis duranensis and A. stenosperma, with their respective expression values (Log2FC and FDR). (XLSX) [file pone.0198191.s011.xlsx]

## Sheet: S7 Table
Gene model	Log2FC A. duranensis	FDR A. duranensis	Log2FC A. stenosperma	FDR A. stenosperma
Aradu.0124J	0.782729	0.911254	2.7741	0.008322
Aradu.019PN	4.25034	2.73591e-07	3.20667	4.72845e-13
Aradu.01B4C	-2.64431	0.0203412	-1.22144	0.557711
Aradu.01CF0	2.5401	0.00413399	1.70594	0.00119664
Aradu.01T4M	6.54987	2.10376e-13	3.21843	5.9563e-12
Aradu.023N4	1.44759	0.266393	2.20853	1.5942e-05
Aradu.02CFW	1.09347	0.588289	2.11138	0.000151763
Aradu.02RSN	0.353518	1	2.58334	5.9447e-09
Aradu.04E6I	2.05064	0.0546933	2.41208	0.000211976
Aradu.052CR	-3.11007	0.0128391	-0.70958	0.752403
Aradu.05F6Y	-3.64165	0.000728361	-2.80976	1.60235e-05
Aradu.05H52	-2.35814	0.0201382	-0.0213851	1
Aradu.05MVI	3.55014	0.000251014	3.16819	1.50557e-05
Aradu.065GY	-4.20936	7.31659e-07	-1.59101	0.00153127
Aradu.06H1M	2.7452	0.0346179	2.3434	0.359225
Aradu.06Y10	4.59891	0.0121759	0	1
Aradu.08REY	-3.4193	0.000299494	-2.52184	4.4746e-08
Aradu.08TAH	-3.24729	0.00713642	-1.29608	0.163354
Aradu.09H6L	0.166441	1	-3.22834	1.37857e-07
Aradu.0A8NK	-2.03445	0.0316107	-1.32894	0.00985477
Aradu.0BT33	1.76254	0.272402	2.1065	0.0304111
Aradu.0C9TU	2.33794	0.0121793	0.625432	0.792198
Aradu.0CM87	2.16135	0.0290455	3.61466	2.88883e-12
Aradu.0CQ9D	-4.46748	0.00989627	1.22552	1
Aradu.0GB26	5.05945	1.04275e-09	3.07461	4.27971e-12
Aradu.0H1MY	8.74387	1.91285e-05	3.34162	2.11459e-11
Aradu.0H2L9	2.16162	0.0186042	1.75099	0.000203781
Aradu.0H703	-3.31691	0.0010695	-2.51145	3.25686e-05
Aradu.0H874	0	1	-2.65234	0.0263218
Aradu.0K49H	-5.08401	0.000662704	-3.8763	4.79377e-08
Aradu.0K58L	5.43712	0.000307619	7.79082	3.13284e-05
Aradu.0KQ9H	-1.6521	0.199523	-2.04393	0.000110909
Aradu.0L6XH	2.55363	0.00499761	1.75519	0.0118215
Aradu.0N117	-7.00814	0.0238231	-4.10953	1
Aradu.0N6KW	0	1	3.12495	0.0276493
Aradu.0N756	8.4583	7.99083e-05	0.154235	1
Aradu.0Q6Y1	2.12703	0.0503496	2.29853	4.1404e-05
Aradu.0QP9J	2.08348	0.04743	1.72404	0.0128107
Aradu.0RG1D	2.52882	0.0129063	1.88268	0.106285
Aradu.0SV2V	-3.54503	0.0271968	-1.59948	0.0590785
Aradu.0VF1H	-2.5994	0.00280152	-1.12966	0.0623286
Aradu.0VN2L	-2.33516	0.0102439	-1.05089	0.0835539
Aradu.0X3DX	0	1	4.01816	6.44492e-15
Aradu.0X4TI	2.47184	0.0346193	1.94531	0.00802987
Aradu.0X68Q	4.9845	2.16667e-05	1.83126	1
Aradu.0Z207	-3.01076	0.017384	0	1
Aradu.0Z25V	7.05494	6.54818e-10	0	1
Aradu.0Z2ZN	2.43622	0.00700721	3.49614	5.75943e-13
Aradu.0Z8XN	-3.45639	3.12197e-05	-1.28167	0.0160442
Aradu.0ZG2X	-2.17351	0.0209313	-0.427686	1
Aradu.10M4V	2.20181	0.0210032	0	1
Aradu.10WEW	2.57248	0.00321328	1.18437	0.053554
Aradu.115J9	-3.22287	0.0261245	-0.963598	0.957764
Aradu.122WK	2.03426	0.0485218	2.01949	0.000211202
Aradu.1232H	4.41755	1.4876e-05	2.90142	6.3742e-07
Aradu.12ETV	2.89869	0.00106912	1.19061	0.03469
Aradu.12T0R	-2.37673	0.0145744	-1.76314	0.000226101
Aradu.12VDJ	6.89592	1.45564e-09	3.3583	5.67772e-10
Aradu.1347E	-3.95752	0.00135944	0.120362	1
Aradu.13SBF	2.43505	0.0110044	2.74461	8.78267e-07
Aradu.14EED	-2.85482	0.00154901	-1.40389	0.0308213
Aradu.15JI0	3.37097	0.00022218	1.63489	0.043009
Aradu.15WFY	4.64532	5.22091e-08	3.89592	4.81172e-12
Aradu.1659P	-2.17131	0.0245497	-0.999056	0.168455
Aradu.18EWZ	3.16381	0.00139361	2.15987	2.62817e-06
Aradu.18J05	-1.19648	1	2.37221	0.0021279
Aradu.18TLF	-2.83859	0.00100916	-1.74447	0.000226101
Aradu.199G1	2.68904	0.00230821	2.21524	1.1259e-05
Aradu.19F6X	2.67234	0.00641461	0.949785	0.529848
Aradu.1A3FB	4.11153	5.7766e-07	2.91871	1.2821e-10
Aradu.1BA76	-2.30263	0.0182185	-1.01873	0.196889
Aradu.1C9UI	6.05972	1.35332e-12	5.59943	8.90442e-31
Aradu.1D82M	3.21899	0.000910493	1.71419	0.00419986
Aradu.1ES85	-2.40877	0.0149782	-2.2474	0.000106607
Aradu.1F2UP	3.51615	0.000208073	1.34231	0.326738
Aradu.1F5AZ	3.70599	5.9022e-06	2.14113	1.83797e-06
Aradu.1G2BN	0	1	5.79964	3.24211e-13
Aradu.1GS41	-2.36081	0.0188062	-0.686779	0.669196
Aradu.1H2UR	-2.40572	0.00943637	-1.16344	0.0934756
Aradu.1IC21	-0.798519	1	-2.86919	0.0275467
Aradu.1J1TJ	-4.02168	0.000383189	-3.19078	1
Aradu.1J279	-3.61278	6.79395e-05	-2.20415	2.09417e-05
Aradu.1LZ8T	3.75992	1.26521e-05	3.01884	8.21422e-11
Aradu.1MT6I	-2.55751	0.0121759	-0.357036	1
Aradu.1P1D6	-2.3321	0.00882253	-0.93605	0.154957
Aradu.1R4IH	2.45203	0.0347997	1.39101	0.279144
Aradu.1S9VI	-3.44741	0.005135	-1.18498	0.19581
Aradu.1SK9N	2.61767	0.00250638	2.09238	5.6695e-06
Aradu.1V1PL	-2.39531	0.0114456	-0.710401	0.498559
Aradu.1V7PF	-2.24923	0.0399606	-1.04355	0.318308
Aradu.1V9BS	2.42919	0.0121759	1.31104	0.16611
Aradu.1VK8G	2.32197	0.0233275	0.715411	0.642666
Aradu.1W5FD	3.35677	0.000155517	3.21431	1.25543e-08
Aradu.1X2PC	-2.54353	0.00336226	-2.09532	2.52069e-06
Aradu.1X6G8	1.17751	0.471334	3.20216	3.24211e-13
Aradu.1XR31	3.39447	0.00137369	0.171779	1
Aradu.1YE7N	2.88128	0.00230821	0.536742	1
Aradu.1YK0L	1.94123	0.0566421	2.80006	4.5466e-07
Aradu.1YS5S	1.48963	0.21759	2.31371	5.83025e-07
Aradu.1Z3IL	-2.28111	0.0263201	-1.18484	0.169334
Aradu.1Z587	2.4278	0.0119441	1.1146	0.297815
Aradu.1ZF9X	3.74485	0.0271968	4.04195	3.46314e-06
Aradu.1ZQ3K	-2.88824	0.026335	-1.34096	0.973179
Aradu.1ZR6L	-3.10217	0.000234978	-1.4099	0.0058433
Aradu.1ZX0E	-2.57507	0.0130259	-1.54758	0.0477904
Aradu.203ID	5.55561	5.9022e-06	0	1
Aradu.20INS	1.3328	0.584351	2.20594	8.39541e-06
Aradu.20JKI	6.47526	9.202e-11	4.41832	2.02117e-10
Aradu.212W8	1.50422	0.218816	2.38235	4.91772e-07
Aradu.215DG	2.62013	0.0222787	1.8752	0.00290246
Aradu.22KJ4	-2.55015	0.0272849	-1.62917	0.00536022
Aradu.23179	2.87688	0.0529898	6.89599	0.00750357
Aradu.234X6	-3.83281	8.78889e-05	-1.26592	0.110325
Aradu.237HP	2.41095	0.00851551	1.8031	0.00969989
Aradu.23D9S	2.39182	0.0175159	0	1
Aradu.24NBV	1.73894	0.756099	2.01812	0.000200564
Aradu.25598	2.0096	0.0398449	1.71235	0.000554328
Aradu.25UEB	2.29877	0.0204085	1.74725	0.00117009
Aradu.26P3H	4.7595	3.61101e-06	3.23631	0.000454378
Aradu.27C7S	4.7193	2.22547e-08	3.55632	2.80662e-12
Aradu.27SYD	-3.07614	0.0223324	-1.35628	0.0750772
Aradu.289R9	-3.2112	0.00290931	-1.65	0.044841
Aradu.289WG	0	1	2.91036	4.82772e-06
Aradu.295V7	2.88035	0.000875137	3.48829	1.18784e-13
Aradu.2A606	-3.32377	0.0498545	-1.41176	0.168833
Aradu.2BI4W	2.31706	0.0381851	2.14428	1
Aradu.2C28W	-2.86433	0.0451465	-1.03611	0.907573
Aradu.2C4FK	1.54051	0.201484	3.38744	8.49358e-11
Aradu.2DM5J	1.36596	0.409424	2.06322	5.8285e-05
Aradu.2E07P	2.79297	0.00783043	3.12495	0.0276493
Aradu.2F2TZ	2.26133	0.0164835	3.4367	5.47997e-11
Aradu.2H1GD	-2.05902	0.028381	-1.57161	0.00116969
Aradu.2I26G	-2.56356	0.0129561	-1.75051	0.000756579
Aradu.2I595	-2.41772	0.0236506	-0.95948	0.181681
Aradu.2J33I	-2.34113	0.0262606	-0.553382	0.972585
Aradu.2K5UT	-2.37078	0.0149641	-1.29145	0.0311724
Aradu.2KP6G	-3.17866	0.0307756	-1.33817	0.0237309
Aradu.2L2SE	-2.53056	0.0297928	-0.947545	0.233864
Aradu.2LH1B	2.30388	0.0163897	1.11007	0.0750772
Aradu.2QN43	2.86156	0.000946514	2.15582	1.32225e-05
Aradu.2QX0T	3.7213	5.9022e-06	3.87152	5.61558e-17
Aradu.2RN1W	1.17831	0.797252	2.64645	0.00644371
Aradu.2S5CB	2.1302	0.151439	2.4608	0.0190062
Aradu.2SK6X	2.09088	0.0281299	0	1
Aradu.2U1V2	-4.59977	6.80354e-08	-2.29078	3.73384e-07
Aradu.2UI08	0.999512	0.651968	2.37843	7.79151e-08
Aradu.2W676	1.01192	0.92195	2.59835	3.99796e-06
Aradu.2X0TU	4.28382	1.69009e-07	3.77239	1.04705e-16
Aradu.2X47D	4.64193	1.8426e-08	4.68044	1.41351e-23
Aradu.2XW42	5.29666	0.000662704	-0.0437643	1
Aradu.2Z03S	-2.89162	0.0202839	-0.327893	1
Aradu.2ZM68	7.35342	0.00868901	0.686738	0.98102
Aradu.30I58	2.60953	0.00272446	2.35069	2.48497e-07
Aradu.31IUC	-3.22481	0.000634037	-2.39453	1.4823e-06
Aradu.31RVV	-3.41481	0.00612982	-1.12842	0.0899131
Aradu.320AL	1.45432	0.373208	2.03769	0.00510222
Aradu.329PQ	-3.09795	0.0189501	-1.6522	0.00363806
Aradu.32RQ0	2.20465	0.0248336	3.42824	2.11455e-09
Aradu.33VZ6	3.44364	3.65524e-05	2.83801	3.80224e-10
Aradu.348PZ	5.42725	3.55881e-10	4.22941	1.64554e-19
Aradu.34QFB	4.25707	2.13746e-07	3.44406	2.97171e-14
Aradu.353FG	-2.66913	0.00613556	-1.43641	0.0275467
Aradu.356IA	2.93226	0.0162695	3.36188	2.76193e-10
Aradu.356M1	-1.67444	0.466486	-2.20595	0.000113401
Aradu.35LC8	-2.60599	0.00322204	-1.17539	0.0413302
Aradu.35Z4P	3.00771	0.000310355	3.80089	6.3697e-17
Aradu.3602N	3.35215	4.4206e-05	1.90743	4.1382e-05
Aradu.366M2	2.57316	0.0029772	2.56512	6.20153e-09
Aradu.383XS	2.02063	0.0331641	1.73472	0.000235669
Aradu.38DG2	-3.10805	0.00291865	-0.694056	0.523601
Aradu.38T8A	-2.2639	0.0464751	-0.769414	0.810406
Aradu.38TXW	0.978635	0.70561	2.85798	2.00787e-10
Aradu.39V24	-2.4587	0.0200707	-1.4787	0.169551
Aradu.3C2YM	3.32846	7.79239e-05	0.552033	0.790348
Aradu.3C7YP	-2.23765	0.0413979	-1.3327	0.0256922
Aradu.3CJ36	-3.84858	0.000162833	-2.59712	1.57531e-07
Aradu.3E0D8	-2.09697	0.0261245	-1.9242	2.48856e-05
Aradu.3F0JH	2.59876	0.0129063	2.3083	0.00105878
Aradu.3HG4P	7.00186	8.18946e-10	-3.19078	1
Aradu.3K9KE	3.4658	3.25852e-05	4.69524	1.78708e-18
Aradu.3L0G1	1.52287	0.208721	2.04333	1.5942e-05
Aradu.3LU9S	-2.74337	0.0168274	-0.596425	0.788976
Aradu.3MD78	-2.08102	0.0366917	-1.60631	0.00376087
Aradu.3MX9T	5.11125	1.09627e-05	1.43095	1
Aradu.3N4PQ	2.34629	0.0225111	1.42364	0.0161958
Aradu.3PC6T	3.88092	6.94703e-05	4.07234	1.05424e-10
Aradu.3Q340	4.26899	2.83756e-06	4.21307	1.28215e-18
Aradu.3R22E	4.00676	0.00965995	9.08812	1.16355e-10
Aradu.3S81N	-2.00096	0.0382055	-1.89111	3.7883e-05
Aradu.3SF0M	-2.87025	0.000662704	-0.68466	0.484057
Aradu.3SJ7C	-2.19968	0.0327268	-1.39524	0.014033
Aradu.3TT1Y	5.64077	1.14486e-07	10.3874	1.38852e-18
Aradu.3UM4X	2.69321	0.363273	2.08111	0.0427455
Aradu.3V07T	4.69409	5.05124e-07	4.91457	2.45864e-08
Aradu.3WC73	2.57274	0.00511384	3.53419	6.67118e-14
Aradu.3WF0K	-3.15727	0.0105937	-1.17049	0.26252
Aradu.3X7SX	2.38555	0.019608	0.241993	1
Aradu.40GCA	4.41755	1.4876e-05	1.65253	0.24288
Aradu.40I5I	-3.82393	0.00965995	-1.76261	0.00295606
Aradu.412P9	2.25333	0.0126996	2.24978	4.91772e-07
Aradu.4157Y	1.63852	0.342239	2.44752	0.00644769
Aradu.418IY	-3.64411	0.0192335	-0.717409	1
Aradu.418U8	2.71889	0.209014	3.33514	0.00995393
Aradu.420FT	-2.9213	0.0233897	-0.520862	1
Aradu.427SB	1.5376	0.217664	4.93174	1.5723e-18
Aradu.42E7V	0.853174	1	3.63113	7.7845e-10
Aradu.42GVF	3.19548	0.473982	3.63708	0.000138108
Aradu.42JCX	2.46422	0.00603702	0.980199	0.228643
Aradu.42KZ7	2.23382	0.0245364	0.684724	0.72184
Aradu.43BK3	-2.35756	0.0129561	-1.77241	0.00171153
Aradu.43YTY	-2.2343	0.0304381	-1.06951	0.189297
Aradu.43YX5	1.73139	0.131532	3.75081	1.04632e-07
Aradu.445PW	-2.08533	0.0371877	-1.18952	0.0637431
Aradu.44KEY	1.85054	0.0697366	2.72482	6.20153e-09
Aradu.45E4F	-4.46054	0.000120449	0	1
Aradu.45G9P	0.720933	1	2.5252	0.000370161
Aradu.45WUM	5.90772	8.18946e-10	3.05715	3.29487e-09
Aradu.46DEV	2.92639	0.000929575	3.29486	5.87374e-11
Aradu.4727V	-2.93152	0.0234711	-1.2571	0.612707
Aradu.47GW5	2.78955	0.00650875	3.93974	1.16542e-11
Aradu.47HWK	2.00997	0.0411424	1.45914	0.00781885
Aradu.47T2G	-2.49451	0.00647593	-1.56482	0.00231732
Aradu.48B5U	3.10477	0.166079	2.77921	7.42964e-06
Aradu.493QN	-2.08201	0.0418645	-1.19873	0.0454918
Aradu.4967G	3.07602	0.00148009	2.16577	0.000118108
Aradu.4B6GH	3.25335	0.00280152	4.06577	1
Aradu.4BB0R	-2.98586	0.0283897	-1.19612	0.516689
Aradu.4D3N6	-4.03396	0.000928756	0	1
Aradu.4DV0N	4.22255	2.83756e-06	0	1
Aradu.4G0ZP	2.51288	0.00377197	3.0789	1.3648e-12
Aradu.4GU5A	-2.57237	0.00421065	-1.50777	0.00942755
Aradu.4I5UW	-2.41195	0.019608	1.31355	0.0762402
Aradu.4IN7K	1.98563	0.137858	3.04432	0.00141945
Aradu.4LY04	4.33197	2.673e-07	2.02433	0.0379266
Aradu.4M6CF	2.95317	0.000497648	3.56066	4.49623e-13
Aradu.4M7RM	3.47848	3.22402e-05	3.1347	2.7234e-11
Aradu.4N10P	-3.39709	8.10063e-05	-2.21179	2.56937e-06
Aradu.4N3HV	3.61173	5.15111e-05	2.59027	2.24273e-06
Aradu.4RE2S	2.72704	0.00181335	2.28618	6.90829e-07
Aradu.4RJ0E	1.62242	0.161646	-6.84341	0.0116547
Aradu.4T5J3	3.98492	3.39822e-06	3.52235	1.75459e-08
Aradu.4U5KX	-2.60738	0.0235752	-0.887443	0.225074
Aradu.4X60D	3.07281	0.000310355	2.88175	3.08562e-08
Aradu.4X7WG	2.80209	0.00150922	-3.19078	1
Aradu.4XP3R	2.31753	0.0122846	2.84957	2.1094e-07
Aradu.4XZ0U	0.119407	1	2.32248	0.0049922
Aradu.4ZJ4A	0.186108	1	3.96623	0.0118032
Aradu.50ZYK	-3.44379	4.24926e-05	-1.51915	0.00299308
Aradu.51F84	2.28341	0.0112542	2.76819	1.95409e-10
Aradu.52QUJ	3.61247	1.86953e-05	4.62027	2.21547e-17
Aradu.537VV	2.60954	0.00322204	3.21188	3.18125e-09
Aradu.539EP	3.49425	2.22837e-05	4.07872	1.47169e-19
Aradu.54E1H	2.86514	0.000649471	2.15736	1.68815e-06
Aradu.54E80	-3.04227	0.000477293	-1.68053	0.000618635
Aradu.55LZT	-1.09388	0.623542	-2.04335	0.000174449
Aradu.55M8P	8.1019	0.000411821	0	1
Aradu.55RDX	2.17475	0.0325995	-0.127481	1
Aradu.568QK	0	1	-2.80246	0.0375564
Aradu.569K2	2.2199	0.0174938	1.0774	0.134209
Aradu.56C76	1.8672	0.0613703	2.73393	1.30319e-06
Aradu.56IA0	2.10551	0.0259202	1.69384	0.00396833
Aradu.56SP3	5.48162	1.20406e-10	5.25894	5.96569e-28
Aradu.57C0B	-0.378422	1	-3.35348	1.05182e-07
Aradu.57TMQ	-3.98478	0.0438992	4.06577	1
Aradu.57XT1	2.6113	0.0211822	0.355673	1
Aradu.58WGM	-3.46349	9.13006e-05	-2.26765	1.55463e-06
Aradu.59EZH	-2.80702	0.00333477	-0.0748831	1
Aradu.59KVZ	1.53692	0.422253	2.03538	0.00107371
Aradu.5C0HU	-3.55607	0.00315025	-0.758698	1
Aradu.5CR2H	0	1	3.2738	7.1583e-07
Aradu.5E20L	-2.8881	0.00154628	-0.329885	1
Aradu.5G83P	2.2652	0.0583367	3.33514	0.00995393
Aradu.5H67C	-2.13601	0.0245575	-1.21801	0.0344874
Aradu.5K7BE	-7.31086	0.00868901	-0.0446395	1
Aradu.5N3RK	1.8387	0.263397	4.33576	1.63757e-07
Aradu.5Q1VY	2.00526	0.0373575	2.53017	3.7903e-08
Aradu.5Q7U7	0.678505	1	2.09233	9.75823e-05
Aradu.5QH0B	-3.61428	2.49306e-05	-2.49654	0.000121345
Aradu.5R97S	1.64715	0.140059	2.24039	1.489e-06
Aradu.5R9N2	3.62166	0.000626039	3.14944	1
Aradu.5S6XB	-2.24667	0.0154878	-1.5518	0.00266067
Aradu.5S8J3	2.67628	0.0168274	0.418102	1
Aradu.5T6BE	2.38413	0.00725241	2.97627	2.12077e-11
Aradu.5T6PH	1.36184	0.297363	2.13754	1.34435e-06
Aradu.5UM9W	-2.30902	0.0123158	-0.930896	0.202366
Aradu.5W0HK	3.25614	1	-2.44982	0.032078
Aradu.5Y3I5	0.176217	1	-2.08484	7.80975e-05
Aradu.5Y6Q8	-2.45785	0.0129561	-1.49342	0.0227182
Aradu.5YU3Q	6.15257	1.35332e-12	5.58832	3.07323e-29
Aradu.5YY6Q	2.45313	0.0652176	3.79757	0.0255671
Aradu.5ZC0V	2.12901	0.0228743	3.22892	4.33053e-12
Aradu.5ZT49	-4.65927	0.00458292	0	1
Aradu.60DAC	4.02424	7.7237e-07	2.94579	4.09687e-11
Aradu.60FFJ	-3.13387	0.011639	-0.88221	0.515925
Aradu.60GK5	-2.95748	0.00165214	-1.82143	0.00117009
Aradu.60S2U	2.36076	0.00787298	2.04384	6.25585e-06
Aradu.60TXP	2.94345	0.000634037	2.53693	7.07123e-08
Aradu.617EV	-3.17866	0.0307756	-6.84341	0.0116547
Aradu.62DXS	3.05294	0.000374046	3.42826	1.67503e-11
Aradu.62W74	2.80037	0.0116069	4.62172	1
Aradu.62WGK	1.87517	0.0607528	2.5418	2.25333e-08
Aradu.637TZ	-2.80847	0.000857506	-2.28165	1.98647e-07
Aradu.63EH0	-2.88824	0.026335	-1.60705	0.53498
Aradu.63SET	3.75101	8.68493e-06	4.45953	7.18856e-18
Aradu.63TDV	0.698085	1	2.36416	4.73952e-07
Aradu.63X21	9.14359	2.23644e-06	0	1
Aradu.64BNM	4.82031	0.00458292	0	1
Aradu.64KRI	-3.73134	0.0039141	-1.00915	0.506842
Aradu.64LXI	2.1866	0.018704	2.47181	4.16925e-08
Aradu.64NDC	-1.58795	0.183538	-2.13422	8.81116e-06
Aradu.65BY0	-3.26734	0.0111596	0.30828	1
Aradu.65PG4	-0.732089	1	-6.49891	0.0443473
Aradu.65PX4	2.70864	0.00240395	1.43214	0.00976252
Aradu.65WG6	2.75588	0.00174841	1.97349	2.00241e-05
Aradu.668QS	1.27148	0.430581	2.49176	1.0286e-05
Aradu.66L0Y	-5.43813	0.000127365	-3.05265	0.0108485
Aradu.66U2D	2.53684	0.00453714	2.8745	1.53727e-07
Aradu.671CI	-2.21988	0.0345673	-2.31188	9.01524e-07
Aradu.68MCI	-2.48395	0.0190411	-1.88479	0.00698139
Aradu.68QSX	3.70834	1.59826e-05	2.93435	5.72718e-05
Aradu.68V9U	-7.16743	0.0143058	5.33506	0.526838
Aradu.6960D	-3.43864	0.0331641	0.874991	1
Aradu.69JL5	-2.53336	0.00496094	-1.32562	0.0141984
Aradu.6AI81	-2.34515	0.00831714	-1.12164	0.848746
Aradu.6AL72	-2.40878	0.00675778	-1.54147	0.00170331
Aradu.6DM63	2.98066	0.00476661	1.14153	0.326889
Aradu.6DR3K	0	1	2.29936	0.0228537
Aradu.6E5XK	-2.40685	0.00791565	-2.20821	4.86714e-05
Aradu.6I8N8	3.35652	0.000253739	0.939418	1
Aradu.6IJ6N	2.16588	0.0336242	6.45293	0.0443473
Aradu.6IM3W	-2.50692	0.0151537	-0.666251	0.826975
Aradu.6LP5E	3.09036	0.000336924	3.54306	4.49623e-13
Aradu.6M90V	0	1	-2.79783	1.32954e-07
Aradu.6MH8K	-3.5349	0.00797378	-1.62198	0.106285
Aradu.6QC34	2.01416	0.0347997	1.67101	0.00440782
Aradu.6S06R	-2.81718	0.0194986	-2.00709	0.00269837
Aradu.6T4IB	1.82737	0.555553	3.3658	2.49849e-07
Aradu.6TH01	0.507561	1	2.28107	0.00010722
Aradu.6XZ0B	-2.20049	0.0195055	-0.774555	0.637998
Aradu.6Y4L0	2.54985	0.0180497	0.403996	1
Aradu.6Y8G9	1.90333	0.0603304	3.59503	1.59393e-13
Aradu.6Z465	3.3222	5.49026e-05	2.38401	3.13501e-07
Aradu.70512	-2.18345	0.0337379	-0.388859	1
Aradu.70QSY	2.48208	0.00471453	1.83047	9.88645e-05
Aradu.70X7W	3.08378	0.00758417	0	1
Aradu.71JRQ	-2.51297	0.00528035	-2.00673	0.000625548
Aradu.72595	2.98164	0.000489898	2.86086	1.10136e-09
Aradu.72HG2	1.91428	0.0507903	2.15421	1.62471e-06
Aradu.72K9J	-2.07908	0.0369226	-0.751955	0.449185
Aradu.72KEV	-2.01311	1	2.66698	6.41538e-09
Aradu.72V59	0.665562	1	3.11418	5.48858e-12
Aradu.73H76	-0.0741317	1	-3.21491	0.0276493
Aradu.73MTJ	1.28138	0.626155	3.42128	1.31369e-08
Aradu.74X9S	-2.78424	0.0346179	0.721171	1
Aradu.752ZV	5.21026	5.55894e-09	4.23376	3.32678e-13
Aradu.75AYZ	2.64488	0.0126256	2.4514	0.000302378
Aradu.76095	1.47991	0.287766	2.31371	7.64478e-05
Aradu.764WC	1.42087	0.271702	2.14511	5.52603e-06
Aradu.77M0L	1.2631	0.687308	2.83602	1.14689e-08
Aradu.77SYB	-4.41527	0.0121759	-0.898289	0.366768
Aradu.786V9	-4.24362	3.71827e-07	-1.79446	0.000139639
Aradu.78I1X	2.86883	0.000740656	2.43346	6.25408e-08
Aradu.7946Q	-0.942224	1	-6.84341	0.0116547
Aradu.797TT	-4.65927	0.00458292	0	1
Aradu.7AQ1B	2.18224	0.017569	1.55775	0.00143866
Aradu.7DW66	2.05162	0.031341	1.22552	1
Aradu.7E8G4	0.384859	1	2.91168	7.13197e-05
Aradu.7EY7D	1.81621	0.0731913	3.88885	1.3991e-17
Aradu.7K065	-3.45922	2.62506e-05	-1.46869	0.00517484
Aradu.7K2S3	-3.21933	0.000503157	-2.29067	5.53321e-06
Aradu.7N93N	1.87832	0.756099	3.33514	0.00995393
Aradu.7P7FQ	0.741392	1	2.91902	1.16476e-06
Aradu.7Q0XD	3.39116	4.16027e-05	2.99532	6.79603e-11
Aradu.7Q9WK	-2.6129	0.0045128	-1.35325	0.0187763
Aradu.7QE0L	2.57436	0.00457066	1.06619	0.15573
Aradu.7R5I3	1.44218	0.53721	2.10986	0.0135274
Aradu.7SN56	2.63315	0.00315957	1.38252	0.0196384
Aradu.7W2Z9	2.24401	0.0130386	2.61132	4.29277e-05
Aradu.7W39T	-4.51568	0.000488203	-2.43314	0.359225
Aradu.7W9JR	2.57127	0.00516618	0.0079298	1
Aradu.7XS8V	3.44921	3.0668e-05	2.89994	2.4588e-10
Aradu.7XU9R	-1.94538	0.186104	-2.39563	0.0420637
Aradu.7Z02Q	-2.15975	0.0421766	-0.33222	1
Aradu.80DIT	2.08482	0.0254813	1.80501	0.000121457
Aradu.80TED	5.60391	4.49108e-06	-0.0461954	1
Aradu.81HAH	-2.96759	0.00114183	-1.02972	0.165065
Aradu.82DSF	2.0931	0.0236863	2.39132	4.37698e-08
Aradu.82IUF	-2.66552	0.00365987	-0.809438	0.493055
Aradu.82KWN	-3.68785	8.01311e-05	-1.69874	0.0173765
Aradu.83N8C	4.36333	4.3702e-07	5.10089	2.66477e-13
Aradu.83UZ1	2.92062	0.000626039	0.764458	0.515925
Aradu.84FPB	-2.33323	0.0113671	0.178954	1
Aradu.84JJL	5.1382	0.821908	2.16067	0.0144756
Aradu.853ZC	3.85538	0.0161583	0	1
Aradu.85A6E	0.0977105	1	2.30133	7.40183e-07
Aradu.86JNN	2.75612	0.00133368	1.49308	0.00396833
Aradu.8764I	-2.15339	0.0370787	-1.45735	0.014892
Aradu.876H0	3.16771	0.00110054	6.16708	0.106285
Aradu.87IV3	2.03142	0.0343643	0.874991	1
Aradu.87VSM	3.62514	0.0404077	0.667363	0.918973
Aradu.88SWU	-2.66032	0.00364063	-1.20505	0.0620625
Aradu.8BQ4V	-4.00238	1	7.68441	6.86962e-05
Aradu.8CI8S	0.406987	1	2.54768	0.000501379
Aradu.8D3SW	2.40615	0.00722559	2.67618	1.55107e-09
Aradu.8EQ04	3.95907	0.000634037	2.64974	0.00037288
Aradu.8G7CT	-2.82143	0.0529724	-3.15184	0.000252482
Aradu.8GL4A	-3.77422	0.00124209	-2.07663	0.00245036
Aradu.8GP5U	3.24602	8.01311e-05	2.77866	4.07942e-10
Aradu.8H6GX	-4.00238	1	-3.28844	0.019718
Aradu.8HL1Z	6.27592	4.21136e-06	8.73521	6.89365e-09
Aradu.8IN5J	-2.2401	0.0269559	-1.35546	0.0211581
Aradu.8J00F	2.79812	0.00134152	3.94931	2.25043e-13
Aradu.8J2JE	1.01261	0.755062	2.80627	4.59825e-05
Aradu.8J7ZM	-0.800861	1	-2.93297	0.0201346
Aradu.8JL27	-2.78894	0.0410267	0.944064	0.907573
Aradu.8K8TN	-2.2103	0.0147633	-1.40327	0.00499714
Aradu.8KH6E	1.39415	0.287241	4.16033	7.04354e-17
Aradu.8KW68	2.9643	0.00130736	3.99064	3.48982e-16
Aradu.8LR0G	-2.02923	0.386806	-3.79266	0.0373887
Aradu.8LT75	3.55195	4.00004e-05	2.77862	4.15288e-07
Aradu.8LV0D	1.80441	0.0776252	2.31196	2.00359e-07
Aradu.8P9WR	-1.58239	0.393585	-2.15767	0.000125286
Aradu.8V97A	-3.01884	0.00674032	-1.55503	0.350511
Aradu.8VI8X	-2.569	0.0159343	-1.59233	0.022946
Aradu.8Y4VT	-4.2879	2.436e-07	-1.36961	0.00918091
Aradu.8Y6AX	2.14685	0.0308254	0.0584039	1
Aradu.8Y6WE	2.3712	0.00834593	1.80116	0.000267142
Aradu.8Z9JB	-2.27713	0.0303627	-1.06744	0.134209
Aradu.8ZG8V	-2.67349	0.00426217	-1.53854	0.0150496
Aradu.901R7	-2.65349	0.00190968	-2.10246	5.21783e-06
Aradu.902BX	3.24122	8.8109e-05	3.435	1.47478e-13
Aradu.90QAV	3.87763	6.4794e-06	1.93567	0.000437143
Aradu.91S58	-2.05671	0.0347844	-1.12929	0.0703377
Aradu.92NBY	-3.38731	0.0142728	-0.67492	0.797155
Aradu.934TY	1.69486	0.180618	2.22295	1.51882e-05
Aradu.93CHA	2.41746	0.00683091	0.626901	0.640833
Aradu.93KPA	-0.16592	1	-2.62135	3.43955e-07
Aradu.93RCN	2.12089	0.0537519	2.35501	6.24531e-06
Aradu.947EB	-2.93466	0.0728822	-2.06824	0.0203328
Aradu.947SP	2.39056	0.0298773	1.65071	0.722394
Aradu.94C8N	-0.292044	1	6.45293	0.0443473
Aradu.94ETY	7.62752	0.00333477	1.91073	0.46212
Aradu.94LVA	2.74414	0.0012994	1.52023	0.00216186
Aradu.94MD3	2.24107	0.0331641	0.105273	1
Aradu.95XPJ	2.43296	0.532055	2.54311	1.47526e-05
Aradu.9602J	0.952456	0.870725	2.70099	2.6688e-05
Aradu.96GLA	-2.6604	0.00339184	-1.27775	0.491903
Aradu.96IA2	-4.18993	4.16411e-06	-3.05747	1.26215e-07
Aradu.96S2E	2.93062	0.000509432	2.42042	2.8682e-07
Aradu.979R5	2.50757	0.00446712	1.2109	0.0355575
Aradu.98HXZ	2.19512	0.0192335	-0.0413331	1
Aradu.99LYU	-2.8689	0.00105137	-1.25491	0.0272414
Aradu.99QYP	-7.00814	0.0238231	-2.035	0.0142939
Aradu.9B334	-7.24092	0.0111596	-0.623447	1
Aradu.9BM9J	1.37931	0.294169	2.23005	5.48401e-07
Aradu.9C9ZX	0.405	1	5.7692	1.15799e-26
Aradu.9EZ7Z	2.82914	0.000784491	1.15392	0.0395752
Aradu.9G6FH	-2.75892	0.00148702	-1.35737	0.0164985
Aradu.9G9GJ	3.632	5.2959e-05	-0.235212	1
Aradu.9GI1K	2.35881	0.0084187	2.32702	4.5452e-07
Aradu.9I4XH	-2.71492	0.00409347	-1.13938	0.170874
Aradu.9J9PQ	2.95821	0.000453622	2.16369	4.50948e-06
Aradu.9K3NU	0.599534	1	6.19771	3.89668e-11
Aradu.9K9IH	-4.92996	1.56293e-07	-1.53588	0.00224051
Aradu.9L1PV	-2.5883	0.00945182	-1.47459	0.0224008
Aradu.9L539	-4.75963	2.50349e-05	-1.1772	0.477144
Aradu.9MD7A	-2.111	0.0228924	0.375017	1
Aradu.9MQ2E	-2.22231	0.0412226	-0.43732	1
Aradu.9MZ2X	-2.65314	0.0339068	-0.420756	1
Aradu.9P11W	0.610688	1	2.50104	8.6872e-08
Aradu.9P432	2.72427	0.00202308	2.42358	9.41287e-07
Aradu.9Q8NZ	-2.45136	0.0118974	-0.766762	0.420623
Aradu.9RK40	2.31049	0.00965995	2.33474	2.98704e-07
Aradu.9RZ6U	-2.168	0.0284574	-1.71946	0.00141945
Aradu.9SR9S	2.05778	0.0404077	2.23739	0.000369496
Aradu.9T4H8	4.18705	3.22402e-05	3.02704	0.000550837
Aradu.9V11P	1.85032	0.0629984	2.21771	5.04673e-07
Aradu.9Y5KL	0	1	2.50239	0.0349526
Aradu.9Y73E	3.92823	6.62346e-05	1.12103	0.201955
Aradu.9Y8SB	0.166441	1	2.55661	0.0110491
Aradu.9Y9V0	5.21026	5.55894e-09	4.3574	4.72801e-13
Aradu.9Z02R	1.42021	0.271362	2.14605	0.000537104
Aradu.9Z0RX	6.91599	0.0315394	0	1
Aradu.9ZP9L	4.65948	6.15042e-07	3.38643	5.52603e-06
Aradu.A0FDR	-1.70051	1	-6.62311	0.0283008
Aradu.A0M2I	2.13342	0.026335	0	1
Aradu.A1EFP	2.13797	0.022665	1.13281	0.066213
Aradu.A1STR	-2.06916	0.0300611	-1.50796	0.00372188
Aradu.A1WU6	-2.48832	0.0154878	0	1
Aradu.A24N1	-1.36679	0.484216	-2.23801	0.0154932
Aradu.A30EV	7.96043	0.00073847	0	1
Aradu.A3K6K	-3.49281	0.0331641	-0.701819	0.70981
Aradu.A3PS5	0.517647	1	2.41151	0.00256137
Aradu.A4K6S	0.876764	1	2.50239	0.0349526
Aradu.A52DW	-2.19351	0.0168802	-1.89659	3.69566e-05
Aradu.A6VDY	-2.46575	0.0125838	-0.389897	1
Aradu.A6WNC	2.40048	0.0125838	2.50484	9.42696e-06
Aradu.A6XGF	1.74209	0.0944707	2.07559	3.18989e-06
Aradu.A6XWH	1.4937	0.219343	2.85326	1.00792e-09
Aradu.A7MKH	2.11293	0.0247565	2.19083	1.50697e-06
Aradu.A7RL9	2.07552	0.0335293	3.27504	5.74775e-11
Aradu.A7T72	0.664237	1	2.00134	0.0142939
Aradu.A87UA	-2.46523	0.00758417	-1.44896	0.00949063
Aradu.A8AWS	2.44331	0.00775914	2.15607	3.13024e-05
Aradu.A8HY7	-2.76676	0.00485539	-1.85607	0.00207323
Aradu.A8RS9	0.184338	1	3.25788	8.4996e-07
Aradu.A90PK	3.39447	0.00137369	1.7007	0.940934
Aradu.A9I6U	2.26455	0.0194221	1.47822	0.24051
Aradu.AAS86	2.38702	0.00710939	2.95562	1.89646e-11
Aradu.AF17Q	-2.17414	0.0211743	-1.41127	0.00867061
Aradu.AFL8M	1.94304	0.0459482	2.09725	3.77697e-06
Aradu.AG70H	1.64705	1	-2.23182	6.43359e-05
Aradu.AH39E	2.75424	0.00154935	1.96522	0.000288565
Aradu.AIC9K	1.56541	0.177202	2.01882	8.20371e-06
Aradu.AJX1D	-3.34409	9.8586e-05	-1.05732	0.128557
Aradu.AK4C6	3.02421	0.000273373	3.82978	5.21751e-18
Aradu.ALM1L	1.58264	0.294169	2.76473	8.61734e-06
Aradu.ALT43	1.53459	0.200639	2.16687	1.76287e-06
Aradu.AN1LU	2.82396	0.00691156	0	1
Aradu.ANS8T	-2.13369	0.0254355	-1.89551	3.50714e-05
Aradu.AP4D1	7.19399	0.0143058	1.87077	0.155787
Aradu.AP7MY	-2.74915	0.0254355	0	1
Aradu.AQJ6I	-2.44941	0.0411424	-0.614889	0.95048
Aradu.AR4S2	1.6054	0.156109	2.26408	1.1581e-06
Aradu.AT7BU	-2.62473	0.014402	0.239989	1
Aradu.AU74Y	-2.01974	0.0459482	1.43287	0.00667814
Aradu.AV1HQ	0.677341	1	2.07243	0.000646695
Aradu.AVH2T	2.03069	0.0401166	0.226575	1
Aradu.AW4VB	-3.29762	7.40269e-05	-1.92583	3.43872e-05
Aradu.AX3Z0	3.81628	6.58404e-05	1.75237	0.00389469
Aradu.B0AW0	-3.49281	0.0331641	-1.08067	0.478083
Aradu.B0N2H	-3.39507	0.000584355	-2.35387	2.19574e-05
Aradu.B0REH	1.81038	0.0867117	2.05034	1.48698e-05
Aradu.B0Y2J	-2.36318	0.0225111	-0.566039	0.984665
Aradu.B17TN	2.40901	0.00887815	2.72027	3.88034e-08
Aradu.B18E9	3.67371	3.30008e-05	0.867127	0.277554
Aradu.B1C6F	4.92149	2.103e-08	4.98812	9.38372e-22
Aradu.B1KKT	-2.73559	0.00620894	-0.0464628	1
Aradu.B1W2E	2.38524	0.00901867	1.30747	0.0482282
Aradu.B21Z9	5.3425	4.43147e-10	2.95942	4.86841e-10
Aradu.B2K9J	-2.77829	0.00561495	0	1
Aradu.B45K6	-2.05671	0.0411424	-0.80796	0.361514
Aradu.B4D3A	5.68984	1.72185e-10	3.56614	1.4811e-13
Aradu.B4FEF	2.06711	0.027554	2.60053	6.21589e-09
Aradu.B561I	3.36049	4.44487e-05	1.19824	0.0373887
Aradu.B5CS7	-3.13305	0.036579	0	1
Aradu.B5K6R	-2.06266	0.0471213	-1.23414	0.263456
Aradu.B5TNQ	2.06901	0.0263332	1.10583	0.0536789
Aradu.B63QG	2.23476	0.0250118	-0.0462242	1
Aradu.B7RDX	4.33503	1.56965e-07	4.72954	2.09004e-21
Aradu.B7WMP	1.92551	1	3.01805	0.0079402
Aradu.B7Z5E	2.56274	0.00298054	2.4099	3.84879e-08
Aradu.B82FS	3.49925	0.0192335	0.619241	1
Aradu.B8GCY	2.24646	0.0133749	2.84716	4.86841e-10
Aradu.B8HIV	1.71205	0.168209	2.32258	0.000481245
Aradu.B8LPK	5.79136	5.57292e-05	4.8613	1.12548e-20
Aradu.B8U65	-2.2574	0.0136895	-1.07392	0.0743768
Aradu.B90GQ	4.2821	1.24677e-06	2.9411	4.12122e-08
Aradu.B9597	2.88271	0.000662704	3.95506	4.63715e-17
Aradu.B9UNN	2.18454	0.026335	3.86568	1.63757e-07
Aradu.BAW8N	-2.48902	0.00528035	-1.62469	0.000659313
Aradu.BCZ93	2.26701	0.0123844	2.67954	1.55107e-09
Aradu.BD60N	-2.24298	0.0141696	-1.37461	0.00792337
Aradu.BH13B	2.07531	0.0308738	2.26524	2.2344e-06
Aradu.BI7T6	5.43586	1.59235e-06	4.50291	2.46556e-08
Aradu.BKR3K	2.6974	0.00202308	1.21819	0.0597545
Aradu.BM69P	2.45313	0.0652176	2.71232	7.96963e-06
Aradu.BMJ7K	3.51843	4.53009e-05	3.33466	3.67516e-13
Aradu.BN9N7	-1.06015	0.830122	-2.60117	0.0143275
Aradu.BNM3L	-2.51704	0.0045128	0.193497	1
Aradu.BR38W	0	1	2.78918	0.000105833
Aradu.BR5RX	1.76384	0.0874372	2.0422	8.51737e-06
Aradu.BS8M5	-3.43864	0.0331641	-1.18713	0.710756
Aradu.BUI3V	-3.0897	1	-3.9632	0.000326505
Aradu.BV641	2.27021	0.0596324	7.98265	6.75129e-06
Aradu.BWM82	6.98556	6.46569e-08	8.22968	1.14368e-06
Aradu.BX0IC	1.32824	0.374359	2.13594	9.77764e-05
Aradu.BXL7K	3.96644	2.02645e-06	4.52699	5.8099e-18
Aradu.BY2T1	-4.3048	0.0147636	-3.13742	0.0390099
Aradu.BY4US	1.38382	0.36315	2.57308	2.30955e-06
Aradu.BZ27F	2.01859	0.0512822	2.97592	1.70835e-05
Aradu.BZ66H	0.456809	1	2.07942	1.57851e-05
Aradu.C0153	-3.5351	1.79745e-05	-2.00584	9.46254e-06
Aradu.C04VQ	2.70554	0.00339684	3.74463	2.02598e-14
Aradu.C0F6J	-2.35653	0.00845885	-1.74554	0.000186059
Aradu.C0GKW	-3.21634	0.000662704	-1.39486	0.0163085
Aradu.C0Q6Q	-2.06528	0.0319794	-0.933573	0.250086
Aradu.C19BK	5.45191	0.626831	7.44467	0.000357809
Aradu.C2XPI	2.83525	0.00145825	0.721867	0.526838
Aradu.C3FIF	4.8086	5.00089e-05	2.45722	3.72137e-05
Aradu.C3KKE	2.32756	0.0184314	1.26804	0.348306
Aradu.C4ADH	-2.58055	0.00344612	-2.07164	6.18011e-06
Aradu.C4BQN	-2.8426	0.00214227	-0.107614	1
Aradu.C4IJ9	2.72986	0.00160626	0.517307	0.940934
Aradu.C64A0	-3.68829	0.000381566	-2.35013	0.00797367
Aradu.C6GSG	3.13436	0.000199479	2.63104	1.43935e-08
Aradu.C796Z	7.80355	0.00138024	5.81024	0.246774
Aradu.C881Z	1.47037	0.279683	2.37931	8.35622e-05
Aradu.C8AKW	-2.71453	0.0222787	-0.143393	1
Aradu.C8ZMR	0.436368	1	2.54105	1.44671e-06
Aradu.C97AK	3.75869	1.33779e-05	3.92414	3.24211e-13
Aradu.C9UNF	-5.93323	0.260562	-2.64556	0.00389469
Aradu.CAP3X	3.62514	0.0404077	1.33862	0.084989
Aradu.CEQ4L	3.13554	0.000769773	2.77602	2.72488e-06
Aradu.CFM3B	-2.34187	0.00882253	-1.24726	0.019919
Aradu.CFP9S	2.78684	0.001877	2.91036	4.82772e-06
Aradu.CFZ39	-2.43623	0.00677406	-1.7004	0.000284392
Aradu.CGP74	0	1	-2.24499	0.0478577
Aradu.CH84G	3.30251	0.000223725	4.4037	2.96466e-09
Aradu.CI6AA	2.07134	0.0413979	0.745899	0.410123
Aradu.CJ8Y0	0	1	3.6928	4.79377e-08
Aradu.CJA18	2.09298	0.0447612	1.9458	0.000195176
Aradu.CK902	2.122	0.0264682	1.6058	0.00672778
Aradu.CKL4Y	3.68624	0.0331641	-0.0446395	1
Aradu.CM0TB	1.87791	0.0852219	3.67467	2.01812e-08
Aradu.CM60U	-2.50816	0.00449363	-1.57444	0.00130493
Aradu.CM6S6	5.77457	8.18946e-10	3.68139	2.20406e-09
Aradu.CN3KR	2.12299	0.0217679	0.599385	0.651359
Aradu.CNJ7Y	2.56645	0.00436856	1.62014	0.0065207
Aradu.CQ6IB	2.09788	0.0250118	2.00595	1.42902e-05
Aradu.CQ85M	3.08764	0.000396018	2.56998	1.51628e-06
Aradu.CR9NG	-2.95286	0.00116642	-1.28069	0.0307437
Aradu.CT448	1.94537	0.0460798	3.29455	3.76914e-13
Aradu.CT5EJ	2.44881	0.00626135	3.01055	1.22845e-10
Aradu.CVP8E	2.67043	0.00187708	1.98005	1.41064e-05
Aradu.CWM79	-2.23117	0.0142248	-1.15063	0.040264
Aradu.CX2VY	3.68827	0.00212172	0	1
Aradu.CZ5TY	-3.58343	0.00099544	-1.07148	0.151187
Aradu.CZ6KH	-2.47601	0.00851551	-1.75779	0.00339998
Aradu.D0BEY	-3.41481	0.00612982	-1.41068	0.0194037
Aradu.D0FCJ	2.474	0.00479414	0.841025	0.295686
Aradu.D0NVI	4.30501	4.22962e-05	0	1
Aradu.D0YGW	-2.94297	0.00259463	-0.952161	0.288024
Aradu.D1CF5	3.45347	0.000558674	2.2094	0.00479598
Aradu.D1G1F	-2.95873	0.000720297	-1.35802	0.018077
Aradu.D1GTJ	-3.29547	0.00025788	-1.97461	0.00036271
Aradu.D1MWR	3.25614	1	3.13153	1.32261e-08
Aradu.D1QW8	2.52913	0.00470625	2.11707	2.24751e-05
Aradu.D1XLL	-1.69744	0.208488	-2.06467	0.0118572
Aradu.D29PK	-3.33308	0.00228498	-2.31618	0.0010867
Aradu.D2PDA	-2.87914	0.00292573	-1.29194	0.403918
Aradu.D2V5A	5.79136	5.57292e-05	6.16708	0.106285
Aradu.D2W96	1.50692	0.268136	2.16577	0.000118108
Aradu.D2XUT	-2.33597	0.0236863	-0.810063	0.461504
Aradu.D3TRX	0	1	3.28449	1.97549e-10
Aradu.D43UE	2.38121	0.00869241	0.727903	0.568246
Aradu.D4FDN	-2.88214	0.0149641	-1.09206	0.283562
Aradu.D580V	2.60707	0.18275	3.42942	3.54875e-06
Aradu.D5TX4	2.2726	0.0114713	2.09115	2.80282e-06
Aradu.D6W9N	2.02578	0.0341973	1.48999	0.00339998
Aradu.D6YSS	2.35355	0.00965995	1.81788	0.000210897
Aradu.D7PPK	3.33426	9.54937e-05	3.58925	2.26489e-11
Aradu.D8UDW	-3.15413	0.00681916	-0.00341781	1
Aradu.D9XCS	2.9198	0.0459482	0	1
Aradu.DA245	0	1	2.44752	0.00644769
Aradu.DE5X6	0.572625	1	2.2121	7.27166e-06
Aradu.DES3N	2.3282	0.00932355	1.13565	0.0465004
Aradu.DG6US	-2.74344	0.00580332	-1.07607	0.226556
Aradu.DG88E	-2.92388	0.0126524	-1.07455	0.425947
Aradu.DHI4B	-3.57013	6.62346e-05	-1.54027	0.0041699
Aradu.DII8L	-2.28701	0.0243242	-0.712971	0.549606
Aradu.DKR1D	-4.90626	0.00154073	-0.695243	0.995246
Aradu.DL5JW	-2.85826	0.000853122	-0.876612	0.278043
Aradu.DL7C8	-2.81615	0.00154901	-1.23548	0.0624042
Aradu.DM13Q	-2.79076	0.00413399	-0.997694	0.232043
Aradu.DM4CY	2.34306	0.0119108	2.3549	1.1468e-05
Aradu.DMV7S	3.48141	0.00011716	3.57298	2.39301e-08
Aradu.DN10D	7.01473	0.0238231	0	1
Aradu.DPT5Q	3.24043	0.000650393	3.26325	5.08353e-08
Aradu.DQ0Q1	3.30789	0.000477272	2.78745	4.08476e-10
Aradu.DSK3D	2.14227	0.0204085	-9.32946	6.30413e-12
Aradu.DT3LR	2.36264	0.0202839	1.21318	0.189718
Aradu.DUK07	-0.378422	1	3.07223	0.00577107
Aradu.DV9UJ	2.00525	0.0432024	1.22078	0.0794973
Aradu.DW9IA	3.54643	1.89482e-05	2.78707	8.37549e-10
Aradu.DWF95	1.94902	0.0459482	2.42569	6.54892e-08
Aradu.DXP84	-2.53173	0.00674032	-1.29483	0.0313222
Aradu.DZ6IG	-4.09306	0.00314383	-0.070201	1
Aradu.E03PA	2.06438	0.0304149	2.30706	4.12462e-07
Aradu.E051H	1.75349	0.128574	2.15317	9.77764e-05
Aradu.E0ZB7	1.44953	1	2.05605	0.00183301
Aradu.E13C6	2.18609	0.0201382	0.99669	0.162358
Aradu.E13L7	3.63775	0.00291865	-3.0635	0.326889
Aradu.E1B6G	-2.29735	0.0224887	-0.781762	0.607161
Aradu.E1GHD	2.52109	0.00492026	0.193676	1
Aradu.E1P3F	3.17032	0.000258455	2.18913	3.42853e-06
Aradu.E1VP1	1.63545	0.157321	2.20651	5.35251e-06
Aradu.E2TII	1.63213	0.137819	2.4696	2.27273e-08
Aradu.E3EHQ	-2.4498	0.00572654	-2.25299	3.28282e-07
Aradu.E3ZED	2.68459	0.00250638	1.61531	0.00146541
Aradu.E4KVE	7.27591	0.0111596	1.8918	0.0177202
Aradu.E5WTS	5.45191	0.626831	2.44797	6.96787e-05
Aradu.E6113	-2.65371	0.00945182	-1.3573	0.44716
Aradu.E6GI1	-3.01847	0.000297618	-2.2238	1.16089e-06
Aradu.E6KMV	-2.53392	0.00468111	-1.69236	0.00335916
Aradu.E721V	2.22879	0.014567	2.79583	2.23566e-10
Aradu.E740H	1.58012	0.171602	3.00745	4.21105e-11
Aradu.E748F	1.44953	1	-3.13742	0.0390099
Aradu.E79Y1	2.68741	0.00230821	2.28651	2.03275e-06
Aradu.E7FN7	2.71803	0.0144159	0	1
Aradu.E8FP0	-7.24092	0.0111596	-1.89879	0.195246
Aradu.E8RZK	2.31426	0.0110189	1.46215	0.00525481
Aradu.E8YHH	-2.1626	0.0471577	-1.32617	0.0466797
Aradu.E9P6L	1.98241	0.0440941	2.1908	2.84183e-06
Aradu.EF37G	1.50524	0.225598	2.78388	9.46759e-07
Aradu.EF5K9	4.75844	5.77464e-07	5.02204	0.752403
Aradu.EFH8P	-2.83916	0.0179762	-2.23098	1
Aradu.EGS0W	2.02329	0.0343289	2.8205	1.70714e-09
Aradu.EI6YW	-2.23911	0.0500933	-2.01319	0.000946842
Aradu.EKX2U	2.28795	0.0263201	2.17406	0.000646695
Aradu.EQ3HU	3.89223	2.02645e-06	3.70706	1.43185e-16
Aradu.EQ9K6	0	1	6.07391	1.81342e-10
Aradu.ESW0P	2.17274	0.0175825	2.79667	1.74624e-10
Aradu.ET8VH	-2.86869	0.00988201	-1.42761	0.0349181
Aradu.ETY3A	2.91361	0.245927	3.13664	1.48825e-12
Aradu.EU9MI	3.30991	0.000145731	2.54218	7.56785e-06
Aradu.EU9QC	1.91212	0.051826	2.29013	2.77708e-07
Aradu.EUH5E	-2.39853	0.00833966	-0.65227	0.583624
Aradu.EW2T1	2.26341	0.0453353	0	1
Aradu.EYN6M	-2.31345	0.0106437	-1.58614	0.000932811
Aradu.EYQ2A	-2.24803	0.0183532	-2.3408	3.22379e-06
Aradu.EZ4BH	-2.32949	0.018887	-1.2571	0.612707
Aradu.EZ8L5	1.66679	0.123777	2.28713	5.74265e-07
Aradu.EZJ0T	-2.99801	0.000929575	-2.59621	3.00637e-06
Aradu.F2DYX	3.45779	3.59741e-05	2.57824	1.13663e-08
Aradu.F2QXB	2.65399	0.00219183	2.0632	3.13398e-05
Aradu.F2VIG	-2.23446	0.017691	-1.45297	0.00521409
Aradu.F35IY	0.704241	1	2.01097	1.0048e-05
Aradu.F3GB1	0	1	2.62575	3.02911e-07
Aradu.F4DAN	-2.7219	0.00603702	-0.351881	1
Aradu.F4EPB	2.10876	0.0965648	3.6217	2.29213e-06
Aradu.F5K8Q	5.15288	1.15304e-08	1.07251	1
Aradu.F64Z1	-2.05653	0.0323332	-1.26342	0.0427449
Aradu.F73NE	-2.48832	0.0154878	-0.948659	0.391251
Aradu.F8RAG	2.54296	0.00485125	3.09049	2.33241e-10
Aradu.F99CN	-3.08582	0.000536047	-0.150722	1
Aradu.F9J6B	-2.95477	0.00574244	1.00113	0.65104
Aradu.FB2F2	3.68083	1.4876e-05	2.35676	5.37164e-07
Aradu.FBN6P	-2.47646	0.0163328	-1.11586	0.257576
Aradu.FBS3S	2.31364	0.0135084	1.02374	0.143628
Aradu.FE24Z	-3.37257	0.00403059	-0.677053	0.800166
Aradu.FF4D5	-2.15928	0.0220782	-0.362984	1
Aradu.FIR15	0.44516	1	-2.31372	0.00996479
Aradu.FIU9K	1.09641	0.569317	2.46924	1.0045e-07
Aradu.FJ2EW	2.03768	0.39146	-2.63675	1.38991e-08
Aradu.FJ7R7	-3.06127	0.0141827	-5.06713	0.752403
Aradu.FK254	-2.55812	0.0412163	-0.713106	0.955289
Aradu.FKD86	2.82254	0.000833681	1.6176	0.00116028
Aradu.FM0YX	2.00016	0.0349295	2.42353	3.00108e-08
Aradu.FMD5G	2.98403	0.000351854	1.84009	5.80495e-05
Aradu.FMN8N	2.59798	0.00256367	1.64665	0.000576578
Aradu.FPU47	-2.58855	0.0254355	0.215919	1
Aradu.FQ1XF	3.63732	3.4062e-05	2.62016	1.2454e-08
Aradu.FQP0C	5.4702	0.000266094	4.69915	0.000127976
Aradu.FT7FJ	2.79485	0.00124209	2.58502	6.52439e-08
Aradu.FU0W6	2.74673	0.00121856	2.73138	4.86841e-10
Aradu.FV3S5	2.42771	0.00691156	1.11228	0.0917033
Aradu.FW4A8	1.37154	0.464226	2.41111	0.00819379
Aradu.FX5WG	-3.4781	2.73824e-05	-1.82042	7.94806e-05
Aradu.FXP12	2.79258	0.00101114	1.98719	1.46783e-05
Aradu.FXW2H	-6.92138	0.0315394	0	1
Aradu.G00JS	4.03702	5.3129e-06	3.8528	6.01982e-10
Aradu.G05M1	-2.04936	0.0318159	-1.01928	0.104163
Aradu.G0DW8	-2.85482	0.00154901	-1.02811	0.185776
Aradu.G14M4	3.21094	0.000111747	4.41138	2.93031e-21
Aradu.G1DD8	2.18835	0.0167426	1.03714	0.0959573
Aradu.G1MD8	4.62956	0.000133857	0	1
Aradu.G1Z6G	2.4411	0.0107123	1.38769	0.0504989
Aradu.G22I6	-2.0758	0.0269331	-0.611857	0.626397
Aradu.G235T	4.03521	4.86972e-05	3.17172	1.59035e-07
Aradu.G26I2	-2.73774	0.00135944	-0.939987	0.155602
Aradu.G2CUK	-3.31657	5.5239e-05	-2.60969	2.45864e-08
Aradu.G3AR6	-3.84614	8.69236e-06	-0.219121	1
Aradu.G4SB3	-2.65136	0.0119441	-0.775791	0.454539
Aradu.G4XFI	0	1	3.04748	0.0390099
Aradu.G5IDI	3.3476	5.15111e-05	3.51428	9.22492e-15
Aradu.G5LQM	1.48906	0.281768	4.06454	3.10152e-17
Aradu.G5UQY	-2.32319	0.0408619	-0.0453653	1
Aradu.G5W2I	2.14344	0.0218952	0.7287	0.468349
Aradu.G5ZWH	0	1	-6.62311	0.0283008
Aradu.G7CZU	0.66071	1	2.25432	2.30955e-06
Aradu.G80S0	1.19456	0.464114	2.20054	2.39658e-06
Aradu.G85IC	0.869134	0.860564	2.84455	4.30792e-08
Aradu.G99LQ	0.623519	1	3.20778	4.49623e-13
Aradu.G9DQQ	-3.43864	0.0331641	-1.70485	0.102023
Aradu.G9WGP	1.29505	0.473987	2.08577	7.58727e-05
Aradu.GAW9B	1.7853	0.0830691	3.00042	1.5784e-11
Aradu.GBM3Q	-2.9765	0.000388505	-1.61507	0.000836484
Aradu.GD2QE	1.86606	0.0903112	2.5552	1.57388e-06
Aradu.GD6AN	2.45737	0.0228796	2.98009	6.92692e-08
Aradu.GEV37	-4.16156	0.00230821	-0.214841	1
Aradu.GF2Y3	2.72517	0.00308373	2.96483	2.05431e-07
Aradu.GFE2N	-2.15293	0.0370641	-1.90942	0.00516246
Aradu.GFT6J	4.65803	2.22547e-08	6.2694	1.51209e-31
Aradu.GG5EE	-4.18517	0.0223917	0	1
Aradu.GG5VI	-3.73682	0.0136127	-2.55734	0.267864
Aradu.GH2K1	8.49297	5.7361e-05	0	1
Aradu.GH5NK	3.21555	9.79304e-05	2.41526	2.78617e-07
Aradu.GJG28	3.01456	0.00414466	3.34996	6.65915e-08
Aradu.GM5S2	5.24168	4.84937e-06	1.30987	0.119489
Aradu.GN3K0	-4.18517	0.0223917	5.02204	0.752403
Aradu.GN81W	-5.74396	0.352115	-3.13742	0.0390099
Aradu.GS29Q	3.83071	4.20572e-05	0.196831	1
Aradu.GSV8K	-3.7394	1.1209e-05	-1.17113	0.0445546
Aradu.GTY35	3.7487	2.56109e-05	1.63489	0.043009
Aradu.GWN14	-2.01441	0.0390961	-2.35163	3.69604e-05
Aradu.H02UW	2.43214	0.0111596	1.46263	0.0408163
Aradu.H0G14	1.86224	0.0629004	3.18082	1.50621e-10
Aradu.H0LHH	-2.67674	0.00594709	-0.261249	1
Aradu.H15D7	2.4249	0.00843579	1.2634	0.0336123
Aradu.H1VDB	-2.05903	0.0381838	-0.679851	0.56544
Aradu.H2LY1	4.38628	4.21136e-06	2.82181	5.45251e-06
Aradu.H3F0Z	2.22815	0.0145547	1.08099	0.0995208
Aradu.H447Q	2.93672	0.00212763	1.91147	0.000278964
Aradu.H4KIC	2.6343	0.00471315	2.72427	6.44466e-08
Aradu.H4WMZ	-2.35891	0.0335293	-1.36377	0.131956
Aradu.H56YA	3.21725	0.000833681	2.7237	0.0111098
Aradu.H641H	-2.23825	0.018887	-2.04571	1.34696e-05
Aradu.H642L	2.71353	0.00140605	2.01758	6.5116e-06
Aradu.H6JMG	5.08419	7.62695e-08	7.08195	1.18358e-16
Aradu.H715D	1.70665	0.292196	2.61728	0.0197359
Aradu.H7DF4	2.66005	0.00281347	0.679402	1
Aradu.H8KNJ	1.32916	0.332122	2.10674	3.51621e-06
Aradu.H8Z7K	-2.10659	0.0237064	-1.61957	0.001096
Aradu.H92LC	-3.39668	3.86157e-05	-1.6713	0.000527488
Aradu.H96P1	0.841068	0.997307	3.35802	1.58119e-13
Aradu.H9IK5	2.18903	0.016818	2.41263	3.46148e-06
Aradu.H9U8I	5.2692	4.43147e-10	4.14457	4.50656e-18
Aradu.H9VE0	6.91599	0.0315394	0	1
Aradu.H9ZJS	1.92473	0.53721	3.83811	2.40013e-05
Aradu.HF3LG	2.98473	0.000910493	1.39657	0.0380534
Aradu.HFY72	0.601756	1	2.17264	1.07124e-05
Aradu.HH067	2.92449	0.000626039	5.37721	8.7239e-11
Aradu.HJV6B	5.14133	3.71827e-07	4.48585	2.25873e-06
Aradu.HLR71	2.56079	0.00395932	0.831653	0.501243
Aradu.HM0P2	-2.68566	0.0411424	-1.57364	0.0156014
Aradu.HM4L0	2.49194	0.0133749	2.67466	2.26359e-05
Aradu.HN9N9	-2.51987	0.00480976	-1.67356	0.000480897
Aradu.HP0TL	2.37564	0.0206079	3.00031	3.06721e-05
Aradu.HP39D	-2.40154	0.00752324	-0.763919	0.500756
Aradu.HQ5WT	4.59891	0.0121759	5.99966	0.163354
Aradu.HQI6K	-2.9571	0.00457066	-1.12935	0.0624042
Aradu.HQT4J	-2.86348	0.00134612	-1.60894	0.00459478
Aradu.HRC5S	0.166441	1	3.51857	0.00354068
Aradu.HS5Y0	1.9453	0.0459482	2.48776	1.94007e-08
Aradu.HT4C8	-2.66654	0.0211822	-1.1726	0.189718
Aradu.HTX30	3.02429	0.00713642	6.48836	7.29549e-13
Aradu.HUT3D	-2.55812	0.0412163	-1.10335	0.178587
Aradu.HWT4U	0.182654	1	2.22758	0.00959303
Aradu.HX36X	4.00288	0.00260571	0	1
Aradu.HXS06	2.53087	0.018133	-0.688674	1
Aradu.HY1A1	5.22094	0.000928756	1.7007	0.940934
Aradu.HZ47Z	1.89733	0.0799853	2.80089	1.14689e-08
Aradu.I0WQG	-2.48781	0.719898	-6.73746	0.0182329
Aradu.I113R	3.77323	8.91401e-06	2.28719	7.90434e-07
Aradu.I118N	-4.77973	5.53111e-07	-1.57009	0.00239772
Aradu.I2RY9	-2.14087	0.0216382	-1.32627	0.011791
Aradu.I2X1C	-2.24437	0.0404077	-0.927755	0.39466
Aradu.I338M	2.37118	0.0225015	4.43101	1.74624e-10
Aradu.I3FT0	-3.36018	0.00758417	0	1
Aradu.I4SX6	-2.33738	0.0155599	-1.7518	0.000495432
Aradu.I610X	3.89599	0.000845444	0	1
Aradu.I67GN	2.12121	0.0231687	1.50199	0.00485427
Aradu.I6GSC	3.70438	0.000299494	2.1051	2.90922e-05
Aradu.I6Z1G	-2.04601	0.0320482	-0.514821	0.899569
Aradu.I722Z	7.42698	0.00688252	0	1
Aradu.I7AP1	2.83819	0.719898	2.25799	0.0123334
Aradu.I8GKQ	3.30003	0.000306275	1.01315	0.365461
Aradu.I8QXT	-2.33864	0.0270313	-0.28033	1
Aradu.I9K2A	3.05046	0.000273373	2.91968	3.25946e-11
Aradu.IBG9B	1.75871	0.336062	6.45293	0.0443473
Aradu.IEK57	2.25155	0.034243	0.561741	0.940934
Aradu.IEX64	-2.82012	0.000912873	-1.80871	0.000134493
Aradu.IF4XP	2.21494	0.0145157	1.41361	0.00516246
Aradu.IF5Y6	2.02077	0.0583367	2.22688	0.000158369
Aradu.IFC7W	2.67352	0.00214692	2.16862	3.42105e-06
Aradu.IG77G	-2.11858	0.188262	-2.80246	0.0375564
Aradu.IH2EE	5.92434	8.02457e-08	9.33672	5.06736e-12
Aradu.IJ0MB	2.59979	0.00253101	2.34706	1.18053e-07
Aradu.IJ2A2	3.26278	0.000114797	3.46653	7.03181e-14
Aradu.ILR69	0	1	3.12495	0.0276493
Aradu.IMB5P	-2.65298	0.00226648	-0.64444	0.598283
Aradu.IN2S6	2.78828	0.00181335	2.51422	7.64602e-07
Aradu.INN7R	1.26796	0.492576	2.67744	8.20371e-06
Aradu.IR9NR	2.21879	0.0161583	1.77008	0.000448563
Aradu.IS5YT	-2.42515	0.00725241	-0.969258	0.148807
Aradu.IU1HH	1.78971	0.0851519	2.21623	1.08012e-06
Aradu.IZ0B7	2.62015	0.00896382	1.68503	0.00396833
Aradu.J0PRI	-2.57815	0.00415868	-1.16425	0.0548198
Aradu.J1CEY	2.46003	0.0107819	-0.304611	1
Aradu.J1KX5	3.6502	8.29581e-06	2.80194	1.86653e-10
Aradu.J1PHS	1.49096	0.210159	2.30737	1.4005e-07
Aradu.J1VYR	-3.44016	2.62947e-05	-1.67383	0.000351575
Aradu.J3B7D	2.36844	0.0075885	3.11962	1.1193e-12
Aradu.J3J8L	5.10614	1.56244e-09	1.51569	0.0041583
Aradu.J41E5	-4.12142	0.0274498	-0.886111	1
Aradu.J49ED	2.91086	0.0143058	0	1
Aradu.J4INW	-2.77935	0.00272446	-1.3436	0.0149093
Aradu.J4IUU	2.23751	0.0133747	3.10571	1.45272e-12
Aradu.J4TQF	2.76019	0.001877	2.75457	8.76033e-07
Aradu.J5EZU	-2.49403	0.026335	-1.36334	0.147933
Aradu.J67TY	0.902186	0.814917	2.3057	3.25686e-05
Aradu.J6P55	2.10684	0.0255316	1.87681	0.000105833
Aradu.J7JS6	2.3187	0.0141696	3.18769	1.77849e-08
Aradu.J7LHV	3.34343	5.10157e-05	3.30795	3.24211e-13
Aradu.J8066	-2.16489	0.0528403	-2.3252	8.33585e-06
Aradu.J8H2F	-2.57985	0.0110842	-1.30974	0.0570529
Aradu.J92L5	-2.52213	0.0084556	-1.24849	0.0283008
Aradu.J9HAT	0.569428	1	2.25799	0.0123334
Aradu.JA3L7	-2.19939	0.0950912	-2.55119	0.00201346
Aradu.JAF9B	-7.16743	0.0143058	-1.61106	0.436733
Aradu.JB051	3.16623	0.000258472	0.500398	0.860863
Aradu.JDX1B	3.11341	0.000251797	0	1
Aradu.JEL8U	-2.61826	0.00353908	0.311162	1
Aradu.JF12J	-3.6699	0.000634037	-2.36335	2.22759e-05
Aradu.JG94E	-5.50478	3.51606e-07	-2.65234	0.0263218
Aradu.JH5R4	2.3024	0.0105978	1.04634	0.0876892
Aradu.JI3DJ	-3.97755	1.4876e-05	-1.90305	0.000396495
Aradu.JJU8Z	2.27937	0.0147434	2.45004	0.00114676
Aradu.JL25Y	5.06025	3.82945e-06	3.91734	0.000233102
Aradu.JL5FQ	1.76979	0.0872397	2.73731	1.08012e-06
Aradu.JL6EF	4.20382	2.88518e-07	4.13642	3.21726e-19
Aradu.JLM18	2.98748	0.000497648	1.15546	0.0864023
Aradu.JLN7Z	-3.10521	0.0198933	-1.27775	0.491903
Aradu.JM1A2	-3.43763	0.00134612	-5.85592	0.246774
Aradu.JRF6F	1.68883	0.129366	3.16724	5.06666e-11
Aradu.JRV68	0.00277493	1	2.41111	0.00819379
Aradu.JU8EK	-4.05909	0.000310355	-1.40626	0.318469
Aradu.JUP0B	-2.04999	0.0802469	-2.11929	0.000329558
Aradu.JV19Z	0.176217	1	-6.73746	0.0182329
Aradu.JXL5S	4.53782	0.0147636	1.69243	0.102023
Aradu.JZ5YG	2.46745	0.00691156	1.84813	0.000136301
Aradu.JZ8MY	-2.08706	0.0335293	-0.315061	1
Aradu.JZV77	2.58803	0.00395914	1.42681	0.0137121
Aradu.K0U58	2.40099	0.011151	2.57206	8.35184e-07
Aradu.K10TZ	1.54084	0.245711	2.3852	2.16475e-05
Aradu.K1SMV	2.15804	0.0299375	0.689063	0.752403
Aradu.K2677	2.30766	0.0101851	3.05499	7.27739e-10
Aradu.K26VM	2.63062	0.00230821	2.37748	1.76531e-07
Aradu.K2DQ9	-3.06127	0.0141827	-1.36145	0.224967
Aradu.K377L	0.401847	1	3.22356	0.00221087
Aradu.K3CEF	2.64152	0.00265274	1.54775	0.0191603
Aradu.K3K6M	-1.29323	0.543965	-2.23378	0.00740058
Aradu.K3NB7	4.79009	9.07227e-09	5.22878	5.96569e-28
Aradu.K3XG1	-3.45359	4.48257e-05	-1.1481	0.0628996
Aradu.K3ZSF	-0.394867	1	2.06105	0.000478679
Aradu.K41I0	4.54366	3.89807e-08	4.4059	7.4216e-20
Aradu.K44L7	-2.22751	0.0169644	-0.671458	0.55841
Aradu.K4APN	2.11982	0.023733	1.80941	0.00045134
Aradu.K4MWL	-2.22048	0.0487318	-0.844248	0.428187
Aradu.K51ZU	-2.82913	0.00324113	-0.730808	0.692208
Aradu.K5CZR	3.06467	0.000383189	1.45857	0.0057433
Aradu.K5WSC	3.24837	0.0003639	3.64657	8.28319e-08
Aradu.K63NX	2.20699	0.0197136	1.97138	3.25686e-05
Aradu.K73MN	2.15053	0.0201382	1.58583	0.00123324
Aradu.K8V1Y	3.86988	7.3472e-05	2.37755	0.0615608
Aradu.KAB2Z	3.95907	0.000634037	0.084266	1
Aradu.KB9NK	1.59632	0.161008	2.5094	5.93911e-08
Aradu.KD2FK	1.08889	1	2.26981	0.00014238
Aradu.KD6QW	-2.29409	0.0144159	-1.45042	0.0043111
Aradu.KEE43	3.57179	1.51266e-05	4.38599	1.58874e-20
Aradu.KF6LM	4.16638	8.69236e-06	2.95582	5.32347e-06
Aradu.KG41H	1.49325	0.255415	2.55307	9.40599e-07
Aradu.KI3UZ	1.60989	0.148399	2.23579	6.32402e-05
Aradu.KJE7Z	-2.95363	0.0207076	0.313597	1
Aradu.KJH8E	-3.41144	0.000310355	-3.27703	8.86331e-05
Aradu.KK1H3	2.49132	0.00474675	1.14859	0.0540669
Aradu.KL4L6	-2.32793	0.0381946	-0.851587	0.537399
Aradu.KM3QT	-2.22541	0.0153495	-1.28884	0.0201216
Aradu.KMG0A	2.11739	0.0228924	2.71922	4.16378e-10
Aradu.KMR0R	4.05389	0.00831714	5.99966	0.163354
Aradu.KN04R	2.86474	0.000650393	2.5779	4.17349e-09
Aradu.KNV7E	3.72211	9.07453e-06	2.28954	1.27494e-06
Aradu.KPP3S	-2.38924	0.0296041	-0.898774	0.233804
Aradu.KQ0LD	-2.16019	0.0192281	-2.04637	4.81596e-06
Aradu.KQV51	2.49152	0.00449146	2.24619	8.33493e-07
Aradu.KRX9K	4.79814	7.46121e-09	4.6452	7.20738e-24
Aradu.KTU5R	-2.88574	0.00916113	-1.12084	0.31633
Aradu.KTW5G	-2.78424	0.0346179	-0.48335	1
Aradu.KV3KX	-2.20822	0.0148912	-1.46364	0.0029291
Aradu.KWB3K	3.80355	3.86433e-05	3.40968	1.48615e-07
Aradu.KWF52	-3.17866	0.0307756	-3.19078	1
Aradu.KZ4HC	2.03025	0.145045	2.90142	6.3742e-07
Aradu.KZW97	1.32328	0.395993	2.35629	0.000116868
Aradu.L0CHF	3.49925	0.0192335	0	1
Aradu.L0FGB	2.42639	0.00885125	1.49961	0.0474267
Aradu.L0PWQ	4.73533	3.08023e-08	4.30802	1.11854e-19
Aradu.L0ZIY	3.00737	0.000479956	2.57706	1.40234e-06
Aradu.L13D3	-2.40629	0.0411424	-0.292328	1
Aradu.L18YW	2.23314	0.0135084	2.38388	5.66246e-08
Aradu.L1GG2	-0.140207	1	2.03669	3.96369e-05
Aradu.L1VNA	1.55178	0.21351	3.32794	2.99308e-13
Aradu.L273D	1.15165	0.607557	2.20003	3.22177e-05
Aradu.L2RSA	-3.50417	2.28105e-05	-1.41378	0.00480191
Aradu.L30M6	-3.86559	0.00831714	-2.08225	0.0992387
Aradu.L3FXW	-2.51908	0.0223324	-1.38935	0.027002
Aradu.L3QBD	-2.34943	0.0260624	-0.528331	0.976578
Aradu.L4IQ2	2.03158	0.0487704	1.90363	8.86456e-05
Aradu.L6CN7	2.39021	0.02079	0.912504	1
Aradu.L6GSR	0.135993	1	2.05409	0.0275296
Aradu.L76IA	-2.83629	0.0135701	0	1
Aradu.L7TUE	2.70469	0.0401166	0	1
Aradu.L86SE	1.51621	0.342239	2.35119	4.09373e-06
Aradu.L8SVN	3.95387	3.62604e-06	2.82771	1.54282e-09
Aradu.L8VRB	-3.78103	0.0115329	-1.28805	0.904395
Aradu.L8WG9	2.56027	0.0161583	4.37874	0.00117009
Aradu.L9WUK	-2.71453	0.0222787	-1.26179	0.338614
Aradu.LAX0E	2.54178	0.00372819	1.40567	0.0103247
Aradu.LBI05	-1.51368	0.997307	2.48114	1.81481e-06
Aradu.LBL22	2.13173	0.0381341	2.70258	2.3988e-07
Aradu.LBL6B	2.1494	0.0199866	1.68667	0.000441353
Aradu.LBT1F	2.99991	0.0104066	2.35448	5.64076e-05
Aradu.LC8HL	-2.39502	0.0126996	-1.48148	0.0917033
Aradu.LCH2B	2.15411	0.0192335	1.50898	0.00216957
Aradu.LCZ1F	-2.67447	0.00211524	-1.54763	0.00180673
Aradu.LD35V	0	1	6.45293	0.0443473
Aradu.LD7BF	1.41081	0.264945	2.36201	9.9722e-08
Aradu.LDI07	2.69128	0.0019704	1.60011	0.00115599
Aradu.LHB41	2.55357	0.00324113	2.31665	4.90569e-07
Aradu.LI3DS	7.68861	0.00268629	0.298413	1
Aradu.LJ1CG	2.18789	0.0178363	4.37874	0.00117009
Aradu.LJ6PL	2.3513	0.00839491	2.16894	9.48035e-07
Aradu.LL2CP	-2.14673	0.0936789	-2.35013	0.00797367
Aradu.LLV7T	-3.64411	0.0192335	-0.520862	1
Aradu.LLW1X	2.18587	0.0218051	1.36506	0.0220156
Aradu.LM0YT	-2.54201	0.0135645	-1.65813	0.0122126
Aradu.LQC4C	1.44019	0.373116	2.25225	0.0292426
Aradu.LSQ2N	3.41383	8.01311e-05	4.51937	1.37302e-15
Aradu.LTB25	2.2469	0.0343592	1.91818	0.000614933
Aradu.LUI60	3.94788	2.22837e-05	3.42181	6.79549e-11
Aradu.LWS3G	4.4204	0.00198064	2.56098	0.0263218
Aradu.LXV06	-2.75501	0.00149831	-0.8084	0.315164
Aradu.LYE3Y	-2.50366	0.00474675	-1.96212	3.82717e-05
Aradu.LZ0RH	1.35915	0.324881	2.74975	4.54778e-10
Aradu.M0G9T	2.59593	0.023996	0.738321	0.73303
Aradu.M0UUE	-2.04093	0.0382055	-0.347244	1
Aradu.M11EP	-7.08998	0.0185355	-0.573678	1
Aradu.M15HC	-2.78894	0.0410267	-0.503683	1
Aradu.M1ANR	1.73303	0.118109	3.87478	7.20103e-15
Aradu.M1PU6	3.73504	0.000258455	2.23526	0.000473819
Aradu.M29FV	2.06589	0.0268805	1.42016	0.00460442
Aradu.M35ST	-2.70291	0.00764776	-1.44472	0.0249834
Aradu.M5R0Y	2.11141	0.0279989	2.28764	5.32347e-06
Aradu.M5WCG	2.08389	0.0296089	0.54092	0.843689
Aradu.M6IGU	2.92827	0.00596192	3.32108	4.68483e-08
Aradu.M7QN4	-2.21343	0.0195055	-0.664856	0.589675
Aradu.M9CLB	3.18308	0.000183324	2.79054	8.35986e-10
Aradu.MBZ2M	-4.89358	3.25679e-08	-1.99273	4.8763e-05
Aradu.MC5GJ	1.78682	0.117005	3.88427	1.33421e-07
Aradu.ME340	-3.81873	2.77558e-05	-0.804631	0.443113
Aradu.ME4LN	5.49071	9.32006e-10	3.61977	3.37676e-08
Aradu.MI3UP	2.33426	0.00871749	3.77161	1.04375e-16
Aradu.MLY6C	-1.36506	0.505707	-2.12886	0.0104961
Aradu.MM215	-2.59287	0.00777179	-1.09907	0.173374
Aradu.MP9TZ	7.35342	0.00868901	0	1
Aradu.MPF4N	2.42395	0.00887516	3.01805	0.0079402
Aradu.MS6GN	-4.04557	1.23783e-06	-1.77399	0.000196375
Aradu.MS73B	-2.64155	0.00872798	-0.337899	1
Aradu.MSL3N	4.16292	3.78332e-07	5.3491	3.07323e-29
Aradu.MT686	2.23773	0.0565302	2.41208	0.000211976
Aradu.MV02I	-2.38974	0.026335	-0.793874	0.437531
Aradu.MVB2G	2.12398	0.0243554	2.10152	7.60638e-06
Aradu.MVM7E	2.82007	0.00250638	2.90516	5.6748e-10
Aradu.MW4MQ	2.08868	0.0281203	1.07934	0.131143
Aradu.MWD9S	2.80129	0.00324933	-5.06713	0.752403
Aradu.MY5RT	2.42307	0.00842845	1.18565	0.0835539
Aradu.MZ0IC	3.58129	0.000131727	2.45346	7.77725e-07
Aradu.N0CP9	2.05307	0.0344874	2.47042	1.36636e-07
Aradu.N1U0V	-2.16856	0.0206793	-1.66818	0.000606191
Aradu.N1Z7I	0	1	-3.30881	2.28801e-09
Aradu.N2UA7	0	1	7.56952	0.000153924
Aradu.N2UVI	2.40611	0.00965995	1.26255	0.556392
Aradu.N2X0I	2.32734	0.00936395	1.23293	0.0250604
Aradu.N37A4	2.79768	0.00101004	2.44593	7.02918e-08
Aradu.N39PG	1.55779	0.259726	2.78009	6.42582e-07
Aradu.N3EHS	-2.08508	0.0325474	-1.13282	0.0720968
Aradu.N3KMZ	-2.58538	0.010881	-1.27148	0.102543
Aradu.N3SPH	-4.03248	3.39822e-06	-2.55325	9.20252e-06
Aradu.N3ZII	0	1	2.43211	0.0107943
Aradu.N465M	-2.45478	0.0101851	0	1
Aradu.N4IR4	-2.86081	0.0163328	-1.27113	0.0826053
Aradu.N4SCQ	-2.5017	0.0085624	-0.26632	1
Aradu.N5DK2	3.67372	0.0106763	4.07431	1.41553e-08
Aradu.N5IEQ	-1.30889	0.497559	-2.83731	5.66901e-07
Aradu.N5R7X	1.92473	0.53721	2.34545	0.000538711
Aradu.N64BE	-1.01233	0.681737	-2.13339	1.00559e-05
Aradu.N6P7I	2.05465	0.0300212	2.93792	5.53734e-11
Aradu.N7FJP	1.79828	0.0997879	3.98348	2.21173e-16
Aradu.N7LCR	1.49003	0.244426	2.21599	2.19717e-06
Aradu.N7TNH	-2.52994	0.00523513	-1.77536	0.000431528
Aradu.N8MUP	3.22595	0.000157464	1.34716	0.131749
Aradu.N8VB1	1.49712	0.214141	2.35153	2.19502e-07
Aradu.NB8XZ	4.73675	1	2.48997	0.00250674
Aradu.NC5RM	3.89049	2.99313e-05	3.08656	4.47904e-07
Aradu.NCC2Z	-2.58408	0.00831714	-0.921779	0.358778
Aradu.NCJ0H	0.924876	0.747553	2.2011	1.76947e-06
Aradu.NE5BN	2.28665	0.0149923	1.49796	0.0119278
Aradu.NE81M	2.61437	0.00373077	1.45265	0.0190308
Aradu.NF3KK	-2.06925	0.0443891	-0.565644	0.827856
Aradu.NF8QC	3.65093	1.48912e-05	4.38203	5.44906e-18
Aradu.NG4LQ	2.83398	0.00145061	1.22343	0.0354869
Aradu.NG7W7	1.14225	0.502437	2.78036	2.62881e-10
Aradu.NGF0Q	2.75899	0.00256019	2.72245	7.65364e-09
Aradu.NH8IF	2.15585	0.0194221	1.65434	0.000734283
Aradu.NHB0T	2.85949	0.000680068	3.33979	3.27038e-14
Aradu.NJ2WV	3.17557	0.000158134	2.14684	3.48249e-06
Aradu.NJL4S	2.24847	0.108847	3.18529	0.00014829
Aradu.NK3YY	-2.55616	0.00511384	-0.969753	0.240527
Aradu.NL1YQ	1.64086	0.147837	2.38323	5.72835e-07
Aradu.NN4ME	-2.81631	0.0124672	-1.74128	0.722394
Aradu.NNP8F	1.97473	0.0388185	2.60052	2.20406e-09
Aradu.NP2GP	-2.92673	0.00215795	-0.477615	1
Aradu.NP598	4.77105	2.04753e-05	0	1
Aradu.NPY88	0	1	3.25963	3.65774e-07
Aradu.NR3XC	4.75642	2.16667e-05	8.62445	2.31313e-08
Aradu.NS8UC	2.58507	0.00309133	1.40519	0.00814273
Aradu.NV5R4	-2.35333	0.0410006	-1.24483	0.457422
Aradu.NW834	-2.15815	0.0404077	-0.875545	0.369021
Aradu.NYS45	-2.88824	0.026335	0.104132	1
Aradu.NZM5S	-2.63808	0.00333477	-0.0446395	1
Aradu.NZZ6W	-0.726621	1	-2.0312	0.0338636
Aradu.P0VF2	0.683688	1	6.89599	0.00750357
Aradu.P1TZQ	2.17662	0.0194899	2.33878	6.19525e-07
Aradu.P2C14	4.06901	2.04753e-05	9.10884	8.97944e-11
Aradu.P2LIW	1.54225	0.205055	2.79095	2.5361e-09
Aradu.P2S76	1.43338	0.247003	2.55701	4.25213e-09
Aradu.P3ZN2	1.87292	0.18396	2.71618	0.000414172
Aradu.P4W2F	-2.05553	0.0463633	-1.32347	0.0843788
Aradu.P6DLH	0	1	2.35872	1.00643e-06
Aradu.P6RI2	6.11757	0.260562	3.62658	4.57652e-09
Aradu.P6X1S	3.6586	0.000522534	5.33506	0.526838
Aradu.P7PHD	-0.474438	1	-3.16316	0.00577107
Aradu.P7QP3	4.22171	6.80907e-05	0	1
Aradu.P8D0B	-2.4587	0.0200707	-0.719716	0.692208
Aradu.P8WSM	2.22771	0.316814	2.52027	0.00201346
Aradu.P97BC	-4.0505	5.2959e-05	-2.02731	0.000195555
Aradu.P9DVE	-2.21288	0.0376711	-1.90612	0.0771399
Aradu.P9QYX	1.71	0.369792	2.35129	4.78973e-05
Aradu.PBR53	2.15978	0.0248717	0.786659	1
Aradu.PC0BS	0.412968	1	3.04267	2.00241e-05
Aradu.PC4II	-2.16667	0.023019	-1.88591	0.000554666
Aradu.PCZ19	1.8477	0.0712953	2.27683	1.65994e-06
Aradu.PDC3W	-2.20125	0.0229489	-1.13403	0.0465132
Aradu.PF1EJ	-2.33813	0.00933981	-0.399991	1
Aradu.PF28J	1.775	0.0840843	2.49498	1.45298e-08
Aradu.PF88Z	-2.97055	0.000406242	-1.58481	0.00115196
Aradu.PG2U7	2.26631	0.0123264	2.90481	1.22302e-08
Aradu.PG3PH	-3.13305	0.036579	-2.43314	0.359225
Aradu.PHB5M	-3.25072	0.000186069	-1.38198	0.00981783
Aradu.PHY5X	1.86841	0.218213	2.73594	0.00179304
Aradu.PHZ1R	1.75307	0.090695	2.56983	4.87412e-09
Aradu.PIQ1Z	3.52804	2.46569e-05	5.18644	2.97431e-21
Aradu.PIS3G	1.73558	0.110433	2.9431	8.01915e-11
Aradu.PJ6U1	2.52194	0.0375035	1.43095	1
Aradu.PK4QW	-4.28398	0.000292085	-1.15637	0.387766
Aradu.PP8TF	1.88736	0.0557169	2.35167	8.56753e-08
Aradu.PQP29	0.671542	1	2.12362	8.39541e-06
Aradu.PS4CZ	-2.69345	0.0025699	-0.763263	0.526838
Aradu.PVE8C	2.17481	0.100037	3.52826	3.73898e-05
Aradu.PW32X	-2.91542	0.0185355	-2.23801	0.0154932
Aradu.PWT4W	-3.0914	0.000256732	-0.577813	0.759087
Aradu.PXM5A	2.40697	0.00901867	1.23761	0.0355637
Aradu.PY08C	-2.18727	0.0198801	-0.733377	0.443038
Aradu.PY4IT	3.43938	3.0668e-05	1.61013	0.00117009
Aradu.Q0IZH	1.45022	0.329736	2.92763	4.85413e-08
Aradu.Q0L09	2.35882	0.00839597	1.11421	0.0579017
Aradu.Q0ZWM	3.58824	1.4876e-05	2.91981	2.59282e-10
Aradu.Q14EI	7.27591	0.0111596	7.308	0.000820989
Aradu.Q14N7	2.35363	0.0159203	1.13086	0.267864
Aradu.Q2835	3.10195	0.00196561	0	1
Aradu.Q3FM7	5.67694	6.56277e-10	2.93381	4.37328e-07
Aradu.Q3QE4	-0.589048	1	-2.70865	0.0197359
Aradu.Q4KBE	-2.27499	0.0112422	-1.94283	1.5942e-05
Aradu.Q55UA	2.77904	0.0125838	2.55903	3.54967e-05
Aradu.Q5K4W	1.65643	0.199523	3.68129	0.00123324
Aradu.Q5M0R	2.58627	0.00291865	2.81931	1.62859e-10
Aradu.Q5PIR	-3.33533	0.000223523	-2.87634	0.106285
Aradu.Q5XDE	2.8699	0.000720297	2.64842	4.28532e-09
Aradu.Q6596	2.43599	0.00581483	1.5793	0.0012581
Aradu.Q67RD	-2.19036	0.0198555	-1.51532	0.00301921
Aradu.Q6AHJ	2.54932	0.00349073	0.836708	0.284125
Aradu.Q86YJ	-3.60583	7.04205e-05	-2.6044	8.54366e-09
Aradu.Q8Q5Z	3.40678	0.000157464	4.26355	6.91032e-12
Aradu.Q9E1W	3.37765	0.00202308	4.59785	1.69833e-12
Aradu.Q9H8I	-3.26577	0.0224191	0	1
Aradu.QD3GI	3.61973	3.49785e-05	-0.320215	1
Aradu.QE07L	2.59359	0.036579	-1.4024	0.763834
Aradu.QE4AN	-2.8482	0.00372819	0	1
Aradu.QF5KN	-2.11103	0.0498545	-0.826611	0.463215
Aradu.QGW0X	3.87109	0.00196561	0.743109	1
Aradu.QH0IG	7.17637	5.75021e-13	7.29496	5.09877e-18
Aradu.QI7QB	2.45154	0.0245575	0.925668	0.230978
Aradu.QLP22	2.49378	0.0085624	1.79645	0.00619477
Aradu.QNA2V	0	1	7.79082	3.13284e-05
Aradu.QNE8S	-4.69447	1.56965e-07	-2.9117	6.03456e-10
Aradu.QNZ9U	1.5014	0.45242	2.25799	0.0123334
Aradu.QP7DQ	3.79207	1.78733e-05	2.63331	9.57907e-06
Aradu.QR8IL	-3.38235	0.0404077	-0.41383	1
Aradu.QS2D1	1.93077	0.0529898	2.79348	5.6774e-09
Aradu.QV7H5	-2.65772	0.0460798	-1.03713	0.849326
Aradu.QW2YT	2.15145	0.0190813	1.04727	0.0793157
Aradu.QWS86	2.69321	0.363273	4.60005	0.000267142
Aradu.QX9N9	2.33131	0.00882638	1.87833	4.42769e-05
Aradu.QXQ1E	2.9326	0.000902125	3.43764	7.09938e-11
Aradu.QYM4C	3.36008	4.48257e-05	0.534403	0.797137
Aradu.QZD25	2.57761	0.00314731	1.38823	0.0123334
Aradu.R0BEJ	-4.49359	1.6796e-06	-1.84835	0.0073129
Aradu.R0BLH	2.1857	0.018156	1.6163	0.00106194
Aradu.R0U9B	1.12434	0.538495	2.03902	2.60921e-05
Aradu.R1FTX	4.05353	1.4876e-05	4.65045	0.000185772
Aradu.R23AB	2.49545	0.00655184	2.04446	0.0203328
Aradu.R2ERN	-2.68929	0.00232002	-1.00029	0.139091
Aradu.R2K02	2.31604	0.00943637	1.44829	0.0036703
Aradu.R3HWW	-2.14853	0.0230314	-0.164884	1
Aradu.R3RH0	2.63163	0.00508846	1.31923	0.221869
Aradu.R4DYR	4.07777	1.98644e-05	5.18992	2.7537e-15
Aradu.R4V51	6.80799	2.10376e-13	5.96516	1.58881e-25
Aradu.R57KJ	0.982761	1	2.56098	0.0263218
Aradu.R77UT	-2.45625	0.0085624	-1.57749	0.00377586
Aradu.R84PZ	-1.19329	0.937455	-4.60314	5.03175e-10
Aradu.R92J4	-4.01084	3.61101e-06	-2.37694	8.33493e-07
Aradu.R9SW4	4.52046	5.18417e-08	4.13614	4.39053e-19
Aradu.RCG14	-2.99429	0.473982	-4.27474	0.00375063
Aradu.RDQ06	3.03958	0.000332029	1.53422	0.00362522
Aradu.RFD9D	2.10133	0.0269559	1.49643	0.00502199
Aradu.RG56V	2.13363	0.0404077	1.62345	0.012248
Aradu.RG7TU	2.77827	0.00117098	3.51326	3.11945e-14
Aradu.RH99R	4.37581	1.09173e-06	2.35448	5.64076e-05
Aradu.RK7RG	2.41007	0.00630434	2.69975	7.61521e-10
Aradu.RLZ61	-3.38235	0.0404077	-1.74128	0.722394
Aradu.RMG12	2.17831	0.0232188	1.05216	0.145738
Aradu.RMH27	-2.50408	0.00398624	-1.49088	0.00219855
Aradu.RQ0GF	-2.69319	0.023996	-1.27588	0.389153
Aradu.RTF2M	-2.08312	0.0408619	-2.04487	4.36719e-05
Aradu.RTQ8K	-2.60625	0.00851551	-1.53631	0.0157891
Aradu.RTR6L	-3.26577	0.0224191	-1.90612	0.0771399
Aradu.RU466	2.0905	0.0304381	1.30074	0.023795
Aradu.RU8HS	3.62352	8.50929e-05	2.85637	2.05174e-08
Aradu.RVU0Z	-2.86423	0.00193899	-1.79092	0.000708878
Aradu.RW3HI	2.38415	0.00791565	2.12586	6.25585e-06
Aradu.RWZ7G	-4.04714	0.000153115	-1.30994	0.14607
Aradu.RY2KR	1.94019	0.0511467	2.52959	7.3829e-08
Aradu.RYI9N	-2.47998	0.0177676	-1.30589	0.0493202
Aradu.RYS1S	4.87306	1.98921e-06	2.77831	0.0275467
Aradu.S0KU9	4.91284	5.3477e-09	5.50958	1.12925e-19
Aradu.S166E	2.21685	0.0157198	2.74256	7.3394e-10
Aradu.S16C5	2.81628	0.00155457	2.33542	0.0130616
Aradu.S1T5J	-2.16786	0.0194899	-0.956765	0.143536
Aradu.S1UZ6	0	1	3.70522	0.0373887
Aradu.S2B7N	2.26012	0.0133319	2.50347	3.63452e-08
Aradu.S3QGS	2.62392	0.00356066	1.08808	0.106285
Aradu.S4V52	-2.16698	0.0231687	-0.644218	0.618921
Aradu.S70AZ	-2.84142	0.00155029	-1.9505	4.00163e-05
Aradu.S7YD6	2.21611	0.0151087	2.97791	2.11459e-11
Aradu.S9DWR	-2.14014	0.0460566	-0.620746	0.871339
Aradu.SB3KC	2.03524	0.0315394	2.10191	4.20564e-06
Aradu.SBS1U	2.25909	0.0135189	1.02533	0.121593
Aradu.SC9VF	3.24622	0.00138681	-0.0460565	1
Aradu.SCE2E	1.28076	0.480291	2.42469	4.12488e-05
Aradu.SCF1F	-2.40564	0.0381946	0	1
Aradu.SCT5J	1.59372	0.381023	3.15509	6.6834e-08
Aradu.SD5C0	-4.24623	0.0182354	-1.19279	0.354294
Aradu.SE3WE	3.30077	0.000234027	3.76381	3.44113e-11
Aradu.SEH6L	-3.4385	9.32808e-05	-1.84818	0.000267142
Aradu.SGR1V	-2.09694	0.0261245	-1.05457	0.0870972
Aradu.SH1J0	3.06678	0.00081178	1.50914	0.00443382
Aradu.SH6P7	5.98466	4.36208e-11	2.92091	1.20759e-10
Aradu.SI3S6	-2.90458	0.000659135	-1.38062	0.00908851
Aradu.SJ1TV	-3.42576	6.10423e-05	-3.6383	2.74216e-16
Aradu.SK9II	2.22245	0.016369	1.71734	0.000729422
Aradu.SKW70	-2.28142	0.0110842	-1.26988	0.0155496
Aradu.SL2ND	3.47803	2.49306e-05	3.86113	1.58646e-17
Aradu.SLR60	-2.8544	0.026335	-1.80327	0.00182637
Aradu.SM3K9	2.15837	0.0346973	3.14944	1
Aradu.SM8C1	2.8038	0.00136236	1.23327	0.0926654
Aradu.SQ8X7	4.29764	3.41219e-06	0	1
Aradu.SR17F	3.62514	0.0404077	4.62172	1
Aradu.SS76M	5.66589	3.3452e-06	0	1
Aradu.SYE4G	2.75367	0.00260478	0.928282	0.195418
Aradu.T09Z3	2.08859	0.0254172	2.58004	7.838e-09
Aradu.T0DLI	2.78091	0.00152634	3.14334	2.24538e-11
Aradu.T0GAI	-2.20868	0.0231482	-1.3606	0.0129438
Aradu.T0LS0	1.72866	0.0990145	3.51197	2.08533e-15
Aradu.T0MVW	2.77424	0.00257401	1.20984	0.377158
Aradu.T0P0N	-3.07614	0.0223324	-0.715226	0.895368
Aradu.T1ZRM	-0.347037	1	-2.39563	0.0420637
Aradu.T28MJ	-2.40347	0.0064446	-1.43876	0.0041583
Aradu.T37GN	2.75992	0.00122002	2.17578	1.63332e-06
Aradu.T39L1	1.69828	0.114056	3.06865	1.2658e-11
Aradu.T3Z68	2.89316	0.00893265	0.227772	1
Aradu.T52CY	2.40082	0.00650875	2.57752	4.74713e-09
Aradu.T56CX	2.73171	0.0163328	0.725859	0.515574
Aradu.T6UQL	-5.26926	0.626831	-2.1195	5.64076e-05
Aradu.T6XQA	-2.45244	0.018156	-1.1059	0.24051
Aradu.T720W	2.27527	0.0120513	2.59473	5.24218e-09
Aradu.T8C1S	7.74723	0.00214068	0	1
Aradu.T8ILN	2.45691	0.00498289	1.02052	0.104911
Aradu.TBJ07	-2.25806	0.0294561	1.46539	0.00981783
Aradu.TES1U	1.54643	0.201735	2.17441	7.66367e-06
Aradu.TF2FR	-2.71657	0.00886802	-1.61054	0.0191869
Aradu.TH1E7	1.44855	0.238716	2.05264	4.54064e-06
Aradu.TH6UR	3.26238	0.00329565	4.40672	2.73792e-11
Aradu.THV7P	1.3387	0.381386	2.24649	4.86714e-05
Aradu.TI3VR	1.56913	0.173544	2.79661	1.8454e-10
Aradu.TJL9X	2.26552	0.0117189	2.06066	3.46314e-06
Aradu.TL4NT	0.643769	1	2.12554	0.00864152
Aradu.TL55R	2.40221	0.0217448	1.88672	0.00340164
Aradu.TNP6E	3.07267	0.000532536	1.20103	0.0899131
Aradu.TP3KU	1.5502	0.192491	2.34117	1.40234e-06
Aradu.TQJ94	-7.50237	0.00424782	-0.358386	1
Aradu.TRR88	2.22709	0.0713492	2.11302	8.99319e-05
Aradu.TS004	-1.48883	0.634299	-2.76461	8.88815e-09
Aradu.TSM0G	1.50035	0.291119	2.48303	0.00506188
Aradu.TTC2S	2.80934	0.00166089	1.76681	0.00217391
Aradu.TVX63	-2.20768	0.0163328	-1.51136	0.00240249
Aradu.TW31N	-3.71815	1.6923e-05	-2.6248	5.1359e-06
Aradu.TWP4N	-2.62186	0.00283911	-1.28473	0.0211837
Aradu.TWU0S	2.5954	0.00291865	2.32926	3.23599e-07
Aradu.TY9X1	-2.42754	0.00592954	-1.52782	0.00167033
Aradu.TYQ4J	-2.88824	0.026335	-0.591618	1
Aradu.TYS15	4.43003	1.4465e-05	4.00192	0.000120368
Aradu.TZ1M5	1.85335	0.672874	2.2073	0.00130022
Aradu.TZ5MC	-3.16958	0.00181139	-2.4109	2.03014e-06
Aradu.TZ9RJ	-2.24956	0.0283897	0	1
Aradu.U07GC	3.92428	5.2959e-05	4.56177	9.35603e-14
Aradu.U0BFW	1.51994	0.473982	2.09647	0.0104961
Aradu.U1N83	-2.87345	0.000637261	-1.91073	2.53987e-05
Aradu.U1Q22	-3.33167	0.000296553	-1.65431	0.00256424
Aradu.U1XFT	3.1299	0.000533267	1.94579	0.00651078
Aradu.U2CVT	2.25364	0.015823	-0.955458	0.34728
Aradu.U2R98	-2.59843	0.0131925	-0.789656	0.649611
Aradu.U2YMJ	3.62514	0.0404077	0	1
Aradu.U35FJ	2.36849	0.00938205	1.19046	0.0500071
Aradu.U3FFW	6.82861	1.69009e-07	0	1
Aradu.U3HGP	0	1	2.1065	0.0304111
Aradu.U3WE4	3.29784	0.000153115	1.56821	0.0127002
Aradu.U41C8	-3.15054	0.000251797	-1.38418	0.37191
Aradu.U4EKF	-2.42225	0.0115329	-1.69558	0.00159204
Aradu.U53UJ	2.7567	0.00126454	1.99775	0.0112315
Aradu.U564S	-3.38235	0.0404077	-1.57604	0.201272
Aradu.U5UGY	-2.44517	0.0211822	-2.01194	4.20857e-05
Aradu.U723S	4.16183	2.17714e-06	5.35381	6.12133e-15
Aradu.U7EQR	-2.31702	0.0360168	1.50072	0.874325
Aradu.U7ZJ8	3.87396	4.22674e-05	2.56811	0.0687313
Aradu.U838H	-2.90411	0.0261186	-2.67106	5.97402e-06
Aradu.U8ALB	1.06268	0.752206	2.73594	0.00179304
Aradu.U8NZD	7.49697	0.00535134	7.68441	6.86962e-05
Aradu.U8TGW	-1.38054	0.756099	-2.50206	0.0246601
Aradu.U9A7G	-2.27211	0.0360451	-1.49281	0.101903
Aradu.U9IPR	2.63063	0.0254355	1.82887	0.365461
Aradu.U9SCT	-2.76468	0.00489587	-1.93874	0.00135659
Aradu.U9WH5	2.43997	0.0060126	3.52722	1.35939e-14
Aradu.UB13R	4.14968	1.07092e-06	6.45293	0.0443473
Aradu.UD5NS	2.49317	0.0126046	2.0668	0.0126447
Aradu.UF8GX	1.60072	0.161925	2.73658	2.29613e-09
Aradu.UFS53	0.544122	1	2.80286	0.00108009
Aradu.UG27L	2.40379	0.00697081	-0.594847	0.698805
Aradu.UG385	-2.36519	0.0159391	-1.03141	0.0987311
Aradu.UG4I9	3.05233	0.001877	-0.75737	1
Aradu.UGC9M	-3.63646	0.00598409	-0.794494	0.940934
Aradu.UGD4H	0.166441	1	-2.16772	0.00011335
Aradu.UH457	-2.49605	0.00567817	-1.32391	0.0190108
Aradu.UI1WY	3.54461	1.65883e-05	4.32496	3.49813e-20
Aradu.UIA4U	-2.21804	0.03001	-0.942396	0.270512
Aradu.UIP3J	-1.44554	0.301592	2.57963	3.69673e-08
Aradu.UJ1ZX	-2.33254	0.00937885	-1.28658	0.0209014
Aradu.UK481	-4.22566	8.91186e-07	-1.03331	0.216399
Aradu.UL23E	3.17216	0.000146819	2.38572	3.09407e-07
Aradu.UL8XP	1.61354	0.189051	2.20978	5.37847e-06
Aradu.UM234	4.38398	0.00230821	0.311162	1
Aradu.UMN0V	3.96699	2.22837e-05	5.33506	0.526838
Aradu.UP0S8	-3.98327	0.000427458	-1.95692	0.00043001
Aradu.UQ2CM	-2.37295	0.0217348	-1.21026	0.0598367
Aradu.UQA28	-1.10984	0.572859	-2.02506	2.324e-05
Aradu.USK36	1.16633	0.508747	2.43158	2.10664e-07
Aradu.UTD2W	-4.61366	0.0055787	-0.297226	1
Aradu.UV8L7	1.7939	0.0814723	3.40477	4.49623e-13
Aradu.UW0WF	-2.65606	0.0146144	-1.28475	0.243438
Aradu.UWD0E	3.79198	0.00691156	0	1
Aradu.UWN5P	3.25614	1	3.96623	0.0118032
Aradu.UX98P	2.71127	0.00315957	2.84628	1.06571e-10
Aradu.UX9CD	-3.4288	0.000200106	-1.28712	0.0146376
Aradu.UXN6T	3.8506	2.71061e-06	4.46191	1.13867e-21
Aradu.UXX1B	-2.43466	0.0074927	-1.56378	0.00134734
Aradu.V0SHG	3.02361	0.000297618	3.82311	1.76375e-16
Aradu.V24GR	3.85538	0.0161583	7.88992	1.43868e-05
Aradu.V2RP9	-2.93045	0.00982449	-0.203192	1
Aradu.V2WMY	-3.06093	0.00159794	0	1
Aradu.V322S	-3.38235	0.0404077	-3.19078	1
Aradu.V3CWF	2.91618	0.000845444	2.04446	0.0203328
Aradu.V3DY2	-2.39396	0.0153495	-1.28836	0.0490429
Aradu.V40FE	2.48368	0.0129561	1.70073	0.0116734
Aradu.V5WI7	1.53948	0.201735	2.06793	0.000811205
Aradu.V5YMX	0.445276	1	2.04173	0.00016683
Aradu.V6ALV	2.62747	0.00706189	0.659153	0.97857
Aradu.V6MI1	-2.40266	0.024267	-1.39134	0.148142
Aradu.V73WK	2.18099	0.0472078	0.559106	0.816046
Aradu.V7GKN	2.69063	0.0261186	1.7505	0.0618598
Aradu.V7U3M	-2.90316	0.0137475	-0.755543	0.383139
Aradu.V7W75	2.21976	0.015417	2.16609	4.37325e-06
Aradu.V7ZTF	3.85155	0.000132056	3.65023	1.72998e-10
Aradu.V97ZD	2.63994	0.0072889	1.58184	0.0243074
Aradu.VA9CU	3.24654	0.0433888	-0.343079	1
Aradu.VB99V	3.5041	0.00154073	8.02687	4.73164e-06
Aradu.VBE4X	-3.0897	1	-3.79266	0.0373887
Aradu.VC7KJ	0.267764	1	-2.17311	0.0427455
Aradu.VDD1W	4.73675	1	3.20114	2.65598e-09
Aradu.VE705	2.74938	0.00288851	2.66159	5.11082e-09
Aradu.VFL1P	1.84299	0.105773	2.07558	0.0065207
Aradu.VI8FD	3.5019	2.79531e-05	4.16062	3.80864e-18
Aradu.VIF27	3.58929	4.57438e-05	0.777295	0.420961
Aradu.VIH8G	3.16041	0.000232025	1.98577	0.00121267
Aradu.VK1JK	2.40607	0.00718142	-4.10953	1
Aradu.VK6NM	0	1	-4.52493	0.000803432
Aradu.VL3IZ	0	1	4.38296	1.00562e-13
Aradu.VMK7V	-4.72754	8.04296e-08	-1.51692	1
Aradu.VNB3V	1.54488	0.209096	2.024	0.000541707
Aradu.VP7YH	-2.24384	0.0174938	-1.31113	0.017497
Aradu.VPD9Z	2.12287	0.0254982	1.61005	0.00177915
Aradu.VQ6B4	2.38265	0.0211822	0.625345	1
Aradu.VR345	-0.636194	1	2.92804	0.00039717
Aradu.VST4N	2.2867	0.0130386	0	1
Aradu.VTP3R	0.833528	0.903438	2.07715	0.00072251
Aradu.VV0JI	-2.18622	0.0190813	-0.922273	0.178684
Aradu.VV8YW	-2.71077	0.00808758	-1.22358	0.160954
Aradu.VW5MM	2.08952	0.0567968	2.00585	0.000409766
Aradu.VWT5W	2.46508	0.00569871	3.0087	1.54282e-09
Aradu.VX1BY	2.01616	0.0443779	1.05489	0.215785
Aradu.VXS15	-2.98483	0.0192335	0.531643	1
Aradu.VY6JK	2.32	0.0117654	2.51008	2.50395e-07
Aradu.VZ8XR	-2.29701	0.0277341	0.156896	1
Aradu.W07KG	2.56801	0.00291865	2.85758	8.29404e-11
Aradu.W0CCT	1.85556	0.0691879	2.95492	2.32232e-07
Aradu.W0D1K	-2.80704	0.00110054	-1.43073	0.00520109
Aradu.W0GGD	1.79279	0.0872397	2.28709	6.24874e-07
Aradu.W0LNB	-3.34334	0.000527579	-1.55361	0.00574043
Aradu.W1RLW	-3.0897	1	2.55154	0.00311732
Aradu.W2C81	-2.86963	0.000637261	0	1
Aradu.W2IGQ	-2.42403	0.0141519	-0.729233	0.915885
Aradu.W4RTP	-3.54503	0.0271968	-1.41361	0.383139
Aradu.W52BS	-2.87079	0.0019704	-1.31043	0.418557
Aradu.W5C9S	4.35439	9.50368e-06	3.63708	0.000138108
Aradu.W5KRK	-2.10232	0.036579	-1.39803	0.0313668
Aradu.W6UVI	2.65865	0.00594709	0.66251	0.827856
Aradu.W71HY	-2.28341	0.0144159	-1.77237	0.000530327
Aradu.W79GG	1.11076	0.917116	2.66269	1.89338e-08
Aradu.W7MG7	-2.52793	0.0231482	-0.972051	0.408901
Aradu.W7NWN	2.82683	0.000817936	3.11892	1.18564e-11
Aradu.W8DHG	-2.98586	0.0283897	-1.89879	0.195246
Aradu.W8GHN	2.06319	0.0393869	1.5357	0.0179694
Aradu.W8K8D	-2.79925	0.00376335	-0.660015	0.722394
Aradu.WB4HU	2.25306	0.0173804	2.50908	1.65994e-06
Aradu.WC4B0	2.00822	0.036642	1.01648	0.148896
Aradu.WCR0P	2.8698	0.00124209	3.95809	7.75856e-06
Aradu.WDC4U	-4.64092	0.000290126	-3.90142	6.81752e-09
Aradu.WG391	1.64368	0.201735	2.37901	0.00083688
Aradu.WGD8V	2.37115	0.0113397	0.663454	0.639846
Aradu.WH8HR	3.44197	3.46908e-05	0	1
Aradu.WJU1S	3.60802	2.16667e-05	2.71244	3.08019e-08
Aradu.WK4VE	2.58865	0.00272446	2.5953	3.93407e-09
Aradu.WKJ25	-2.49055	0.0347997	-0.367141	1
Aradu.WMG0K	-0.0749664	1	2.56098	0.0263218
Aradu.WN46D	3.18773	0.00100145	1.42321	0.0424662
Aradu.WN4LA	-2.07415	0.0487704	-0.0160833	1
Aradu.WPA2I	2.64544	0.00706189	2.45774	0.000195555
Aradu.WR3X2	2.37251	0.00805025	2.18418	1.41495e-06
Aradu.WRB0S	-4.70349	0.0037787	-0.607664	1
Aradu.WV5HP	2.39948	0.0092993	3.26842	0.0139293
Aradu.WX5TB	6.72749	2.10376e-13	5.37845	4.14681e-15
Aradu.WY29Y	-2.15443	0.0203412	-0.411302	1
Aradu.WYC64	5.48859	9.35341e-06	5.33506	0.526838
Aradu.WYE4I	0	1	2.7237	0.0111098
Aradu.WYR1J	1.32506	0.329745	2.03484	5.97402e-06
Aradu.X03Q4	-3.0784	0.000448408	-1.25871	0.0301298
Aradu.X0IAM	-4.24623	0.0182354	-2.94097	0.00123324
Aradu.X2HBL	-2.09903	0.0302921	-1.3265	0.0150321
Aradu.X2Y57	2.30856	0.0136895	0.628324	0.669196
Aradu.X33LT	8.38636	0.000113247	4.1575	4.57375e-05
Aradu.X3DNX	3.64025	0.000569056	3.99295	1.28121e-09
Aradu.X3F5M	2.09068	0.0347916	-1.36008	0.0146151
Aradu.X3LUW	2.67159	0.00324483	2.46169	4.82772e-06
Aradu.X47P5	-3.06105	0.00448541	-3.08754	9.44098e-06
Aradu.X4R7M	3.15486	0.00013887	3.74313	1.10412e-16
Aradu.X5JEJ	2.50742	0.00574244	2.02048	0.00245036
Aradu.X69MW	-0.778056	1	3.08482	0.00107466
Aradu.X6AKD	1.85335	0.672874	4.2539	0.00251212
Aradu.X7LBF	5.72921	8.18946e-10	6.01881	1.3991e-17
Aradu.X7THJ	-3.33107	6.79395e-05	-1.06985	0.0926654
Aradu.X7X7E	-1.09238	0.991195	-2.34411	0.0292426
Aradu.X8DP9	-2.12339	0.0436512	-1.16214	0.118229
Aradu.X8LDI	-4.45735	5.78583e-07	-1.55705	0.0117838
Aradu.X8UVW	1.21969	0.442056	2.48914	9.34273e-08
Aradu.X971L	1.92557	0.06077	2.49064	7.99195e-07
Aradu.X9N95	1.41549	0.26771	2.60636	5.40575e-09
Aradu.X9PNA	-1.58133	0.31427	-3.0492	7.16765e-05
Aradu.X9U68	-3.49281	0.0331641	-1.4247	0.268348
Aradu.XAE1D	-1.0275	0.687308	-2.26568	0.0021762
Aradu.XB9DF	1.15633	0.681737	3.32956	1.81428e-12
Aradu.XCE88	-2.66654	0.0211822	-0.482819	1
Aradu.XCU6I	1.32853	1	3.30764	4.56025e-12
Aradu.XD88P	-2.09818	0.0235698	-1.37887	0.00624879
Aradu.XDP02	1.00663	0.823307	3.50646	7.413e-06
Aradu.XHP2L	-2.39305	0.0172115	-0.846904	0.254047
Aradu.XN7XU	-2.40703	0.00697081	-1.56936	0.00127028
Aradu.XPZ1I	-2.28195	0.0125972	-3.88504	0.0255671
Aradu.XR3BY	2.41275	0.0078863	2.06135	3.71882e-05
Aradu.XS7EJ	0.820088	0.860801	2.10259	4.63967e-06
Aradu.XSB36	2.69564	0.00346723	1.35009	0.0407033
Aradu.XSV74	-3.98345	0.00120022	-0.762304	0.715948
Aradu.XW8AZ	6.48909	2.10376e-13	4.88354	4.45547e-23
Aradu.XX5Y6	-4.50323	5.18417e-08	-2.88321	4.2418e-11
Aradu.Y0KDG	-3.74921	5.58307e-05	-1.54325	0.00651078
Aradu.Y0R7I	-2.48451	0.0106763	-1.89776	0.000441353
Aradu.Y24PB	4.15716	2.04753e-05	7.84122	2.11753e-05
Aradu.Y328N	1.13241	0.553925	3.70725	7.64478e-05
Aradu.Y32US	3.8573	1.22014e-05	3.49252	6.62355e-13
Aradu.Y3314	0	1	-2.0312	0.0338636
Aradu.Y4ACF	1.61457	0.150813	2.7562	7.88323e-10
Aradu.Y4VNZ	-2.58206	0.00516618	-0.0464429	1
Aradu.Y5115	5.1382	0.821908	3.32789	4.12608e-05
Aradu.Y5G1G	6.64206	7.91694e-09	4.2659	5.65172e-13
Aradu.Y6LUX	6.36692	4.97691e-09	2.87253	1.2801e-05
Aradu.Y7I9D	-2.61425	0.00345305	-3.15354	2.53722e-10
Aradu.Y7NUP	-0.0120426	1	-2.69391	0.00843191
Aradu.Y7YB2	-2.49516	0.0181724	-0.174954	1
Aradu.Y82F1	3.10705	0.000443892	2.28865	0.00260962
Aradu.Y82HI	-2.94107	0.00200847	-0.8675	0.503487
Aradu.Y8BJ8	-2.97595	0.000527579	-0.631305	0.60811
Aradu.Y8Q46	-2.90916	0.00150922	-1.31215	0.0291087
Aradu.Y924X	3.58064	5.3883e-05	-3.19078	1
Aradu.YA71G	-2.84813	0.00449146	-1.09643	0.151298
Aradu.YB9HI	3.29132	0.000513004	2.46021	1.48375e-06
Aradu.YC3GJ	1.18561	0.548273	2.52233	1.38262e-06
Aradu.YCJ90	-2.32669	0.0183325	-1.11661	0.0963917
Aradu.YDZ7F	-2.14386	0.0278167	-1.0795	0.0830021
Aradu.YEB6U	0	1	3.16433	2.11929e-09
Aradu.YF1F6	-2.58538	0.010881	-0.996249	0.374233
Aradu.YF3W6	-2.67775	0.0307756	-2.17311	0.0427455
Aradu.YFP2T	-3.5673	1.86953e-05	-1.86369	5.96416e-05
Aradu.YFQ3P	2.88884	0.000762771	3.29559	5.95503e-12
Aradu.YHT13	-3.79655	0.00110757	-0.662104	0.648075
Aradu.YIG8H	-2.92516	0.000879856	-1.90142	5.675e-05
Aradu.YIQ80	3.89148	2.00642e-06	3.45743	6.44492e-15
Aradu.YK06D	3.09242	0.00018413	2.54746	5.14534e-09
Aradu.YM9N7	6.638	5.29668e-07	5.37494	4.90569e-07
Aradu.YP8K9	-2.58306	0.0149641	-1.71755	0.0071657
Aradu.YR762	2.11349	0.0243761	1.85223	7.84057e-05
Aradu.YRC2R	-3.21448	0.000315233	-2.15214	1.77602e-05
Aradu.YUA91	-3.08595	0.0433888	-0.867403	1
Aradu.YV0Y1	-3.17866	0.0307756	-2.09926	0.232043
Aradu.YXG3J	-2.22505	0.0162247	-0.791231	0.334376
Aradu.YY1QV	4.45467	1.18441e-05	3.45998	0.0049922
Aradu.YY5C4	-2.48679	0.00496094	-1.54977	0.00151236
Aradu.YZ7HA	-3.15219	0.00105096	-1.90655	0.000431827
Aradu.Z03WD	-2.06721	0.029642	-1.32184	0.0112566
Aradu.Z0AAG	4.27316	1.4876e-05	0.523947	1
Aradu.Z0EIQ	3.02787	0.584351	4.56394	5.30445e-18
Aradu.Z1DQ9	-4.79983	4.92692e-07	0	1
Aradu.Z1QPK	5.48131	2.55445e-10	5.2116	4.98341e-19
Aradu.Z1QR7	3.3716	0.00100145	2.82587	3.81181e-05
Aradu.Z35AI	2.16497	0.0260017	1.69082	0.00240438
Aradu.Z3DCJ	4.02149	1.40315e-05	3.41	7.03648e-08
Aradu.Z3F8V	2.54146	0.00706189	1.06949	0.29012
Aradu.Z3Z17	2.15956	0.0224191	0.755322	0.470045
Aradu.Z4PCL	2.84407	0.00272202	0.49687	0.901615
Aradu.Z5H58	4.42881	8.57625e-08	3.36583	9.45294e-14
Aradu.Z67MQ	2.6619	0.0137309	2.57419	2.94574e-07
Aradu.Z6FJV	2.5907	0.00477835	3.91704	1.62694e-11
Aradu.Z6NV1	-0.177115	1	2.57109	0.000413334
Aradu.Z74IT	-0.64862	1	-3.50088	8.33493e-07
Aradu.Z7FZQ	3.1508	0.00018413	4.39151	2.18492e-15
Aradu.Z87YY	-3.2253	0.00788882	-1.07123	0.389199
Aradu.Z8BLA	3.82934	0.00598409	3.38631	0.114459
Aradu.Z9DZQ	1.85623	0.063139	2.73719	1.64747e-08
Aradu.Z9H21	-3.39375	0.00166089	0	1
Aradu.ZAP5I	4.01214	2.04753e-05	4.18339	3.71189e-09
Aradu.ZBZ36	0.986898	0.701815	2.06212	6.31027e-06
Aradu.ZC3BT	2.14723	0.0229489	0.664178	0.68969
Aradu.ZC5IW	3.98038	1.24677e-06	2.44159	4.15486e-08
Aradu.ZC9DU	1.96013	0.0428116	2.18363	1.61414e-06
Aradu.ZFA07	2.33551	0.0270201	1.94162	0.0275467
Aradu.ZFP7H	-3.44958	7.3472e-05	-1.18173	0.128907
Aradu.ZG6LG	-2.13935	0.0403386	-1.24771	0.0277287
Aradu.ZGG7G	2.15966	0.0337505	1.03127	0.212427
Aradu.ZGJ8P	2.67509	0.00283551	1.69904	0.000468519
Aradu.ZH6BL	4.53075	3.31231e-06	2.26066	3.08907e-06
Aradu.ZI52D	4.23905	2.13746e-07	4.69517	9.11483e-25
Aradu.ZIF6R	2.41964	0.00598712	1.66393	0.000473819
Aradu.ZK8VV	3.15759	0.00115876	2.19605	1.96616e-05
Aradu.ZN9Y3	-3.21439	0.00036611	-1.34185	0.0710808
Aradu.ZR9ZC	6.45321	2.64788e-09	5.77105	7.73644e-16
Aradu.ZRM2P	-2.73669	0.00882638	-0.397862	1
Aradu.ZRV6N	-2.35407	0.0184479	-1.64705	0.00252715
Aradu.ZS4C4	2.7178	0.00313411	2.31008	1.94164e-05
Aradu.ZS6PI	-3.12919	0.000626039	-1.14297	0.124682
Aradu.ZTH93	2.98602	0.000354753	2.29617	3.55854e-07
Aradu.ZV73M	-2.34866	0.00858574	-1.90471	3.14736e-05
Aradu.ZV9U0	3.48394	2.23705e-05	1.03898	0.0899607
Aradu.ZWT01	3.16914	0.000132056	3.47814	5.98567e-15
Aradu.ZY9RD	0.644339	1	-2.02415	9.57907e-06
Aradu.ZYM67	-2.57311	0.00339509	-1.40897	0.00657104
Aradu.ZZ9EE	3.50637	0.000434343	4.09526	2.03014e-06
