# Supplementary material for: Early responses to dehydration in contrasting wild Arachis species
Source: PLoS One. 2018 May 30;13(5):e0198191. doi: 10.1371/journal.pone.0198191 (PMC5976199; doi:10.1371/journal.pone.0198191)
Supplement: S8 Table — Expression profile of 20 A. duranensis candidate genes homologs in the A. hypogaea (cv. Tifrunner) expression atlas from the eFP Browser (http://bar.utoronto.ca/efp_arachis/cgi-bin/efpWeb.cgi). (XLSX) [file pone.0198191.s012.xlsx]

## Sheet: Sheet1
		Gene model	Candidate gene name	Tifrunner contig name	eFP browse expression on specific tissues				Higher expression on eFP Browse
					Roots	Nodules	Main Stem Leaf	Lateral Stem Leaf	Tissue	Value
	Regulators	Hormones and receptors
		Aradu.Y48CE	NCED	Adur40384_comp0_c0_seq1	0.26	0.07	101.85	146.6	Main Stem Leaf	101.85
		Aradu.Q3FM7	ABA HYDROXYLASE	Adur19540_comp0_c0_seq2	120.45	49.56	0	0.31	Pattee 6 Pericarp	211.86
		Aradu.62W74	ACC SYNTHASE	Adur37508_comp0_c0_seq1	0	0	0	0	Pattee 7 Seed	0.38
		Aradu.Z1DQ9	IPT	Adur18007_comp0_c0_seq1	1.13	0.4	0	0.13	Androecium	1.94
		Transcription factor
		Aradu.1ZX0E	DREB	Adur49612_comp0_c1_seq1	1.73	0	0.24	1.13	Reproductive Shoot Tip	2.06
		Aradu.B1C6F	WRKY	Adur41743_comp0_c0_seq1	0.65	0	0	0	Roots	0.65
		Aradu.G1MD8	SCARECROW	Adur11456_comp0_c0_seq3	0.4	0.45	0.5	0.13	Pattee 10 Seed	1.3
		Kinases and Signal Transduction
		Aradu.4LY04	PMCA	Adur45909_comp2_c0_seq2	2.69	1.44	0.69	0.62	Pattee 6 Pericarp	4.73
		Aradu.LLW1X	KINASE	Adur10663_comp0_c0_seq1	0	0.83	0	0	Pattee 1 Pod	1.59
		Aradu. 52QUJ	MITOGEN	Adur10862_comp0_c0_seq1	9.91	6.46	0	0	Pattee 6 Pericarp	19.85
	Efectors	Sugar starvation
		Aradu.637TZ	ASN SYNTHASE	Aipa20445_comp2_c0_seq1	32.86	77.54	37.34	26.93	Perianth	146.47
		Aradu.7W39T	FAD2	Aipa45083_comp3_c0_seq1	40.15	56.56	56.8	158.28	Seedling Leaf	229.32
		Carbohydrate metabolism
		Aradu.ZK8VV	GolS	Adur21763_comp1_c0_seq1	6.43	3.31	0	0	Pattee 10 Seed	71.93
		Aradu.T8C1S	MaT	Aipa32791_comp0_c0_seq3	25.27	96.37	0	0	Nodules	96.37
		Cell wall Biosynthesis and expansion
		Aradu.G235T	EXPA	Adur29148_comp0_c0_seq1	0	2.52	0.64	2.5	Subterranean Gynophore Tip	22.14
		Aradu.6AI81	AQUAPORIN	Aipa9365_comp0_c0_seq1	17.32	5.12	42.28	51.95	Perianth	2699.39
		Dehydration responsive genes
		Aradu.IF4XP	DEHYDRIN	Aipa44860_comp1_c0_seq1	99.98	264.07	4.59	6.67	Pattee 6 Pericarp	497.25
		Senescence
		Aradu.8KW68	CYS PROTEASE	Adur83_comp0_c0_seq1	1.46	0.77	0.8	6.95	Perianth	19.96
		Aradu.DSK3D	SAP	Adur17720_comp2_c1_seq1	69.04	113.34	77.41	111.39	Pattee 10 Seed	3029.01
		Aradu.WRB0S	F-BOX	Adur17668_comp1_c1_seq2	3.2	5.07	1.91	2.23	Nodules	5.07
